# Supplementary material for: Survival analysis of infected mice reveals pathogenic variations in the genome of avian H1N1 viruses
Source: PubMed Central journal article supplement — Sci Rep. 2014 Dec 12;4:7455. doi: 10.1038/srep07455 (PMC4264002; doi:10.1038/srep07455), 2014-12-12
Supplement: srep07455-s1.pdf [file srep07455-s1.pdf]

1 **SUPPLEMENTARY INFORMATION**

2

3 **Survival analysis of infected mice reveals pathogenic variations in the genome of avian**  
4 **H1N1 viruses**

5

6 Zeynep A. Koçer<sup>1</sup>, Yiping Fan<sup>2</sup>, Robert Huether<sup>2,†</sup>, John Obenauer<sup>2,‡</sup>, Richard J. Webby<sup>1</sup>,  
7 Jinghui Zhang<sup>2</sup>, Robert G. Webster<sup>1\*</sup>, Gang Wu<sup>2\*</sup>

8 <sup>1</sup>Department of Infectious Diseases, Division of Virology, and <sup>2</sup>Department of Computational  
9 Biology, St. Jude Children's Research Hospital, Memphis, Tennessee, 38105, United States.

10 Current addresses:

11 <sup>†</sup> Ambry Genetics, 15 Argonaut, Aliso Viejo, California 92656, <sup>‡</sup> Digital Genomics LLC 2151  
12 Dickens Place Drive, Southaven, Mississippi, 38672, United States

13 \*Corresponding authors at: Department of Computational Biology, MS 1135, and Department of  
14 Infectious Diseases, Division of Virology, MS 330, St. Jude Children's Research Hospital, 262  
15 Danny Thomas Place, Memphis, TN 38105, United States

16

17 Phone: 901-595-8126 and 901-595-3414; FAX: 901-595-7100 and 901-595-8559; Email:  
18 [gang.wu@stjude.org](mailto:gang.wu@stjude.org); [robert.webster@stjude.org](mailto:robert.webster@stjude.org)

19

## 20 **Table of Contents**

|    |                                                                                           |    |
|----|-------------------------------------------------------------------------------------------|----|
| 21 | Supplementary Results .....                                                               | 4  |
| 22 | Polymerase proteins .....                                                                 | 4  |
| 23 | Surface glycoproteins .....                                                               | 7  |
| 24 | Nucleoprotein .....                                                                       | 9  |
| 25 | Matrix and nonstructural proteins .....                                                   | 10 |
| 26 | Supplementary Figures .....                                                               | 12 |
| 27 | Supplementary Figure S1. Polymorphic residues in the PB2-coding region. ....              | 12 |
| 28 | Supplementary Figure S2. Polymorphic residues in the PB1-coding region. ....              | 13 |
| 29 | Supplementary Figure S3. Polymorphic residues in the PB1-F2–coding region. ....           | 14 |
| 30 | Supplementary Figure S4. Polymorphic residues in the PA-coding region. ....               | 15 |
| 31 | Supplementary Figure S5. Polymorphic residues in the 61-aa C terminus of the PA-X–coding  |    |
| 32 | region. ....                                                                              | 16 |
| 33 | Supplementary Figure S6. Polymorphic residues in the HA-coding region. ....               | 17 |
| 34 | Supplementary Figure S7. Polymorphic residues in the NP-coding region. ....               | 18 |
| 35 | Supplementary Figure S8. Polymorphic residues in the NA-coding region. ....               | 19 |
| 36 | Supplementary Figure S9. Polymorphic residues in the (a) M1- and (b) M2-coding regions. . | 20 |
| 37 | Supplementary Figure S10. Polymorphic residues in the NS1-coding region.....              | 21 |
| 38 | Supplementary Figure S11. Polymorphic residues in the NEP-coding region. ....             | 22 |
| 39 | Supplementary Figure S12. Variants in the cap-binding domain of PB2 in avian H1N1 IAVs.   | 23 |
| 40 | Supplementary Figure S13. Variants in the PA-PB1–binding site of avian H1N1 IAVs.....     | 24 |
| 41 | Supplementary Figure S14. Variants in the PA N terminus of avian H1N1 IAVs. ....          | 25 |
| 42 | Supplementary Figure S15. The ribbon model of the structure of avian H1 hemagglutinin     |    |
| 43 | (HA). ....                                                                                | 26 |
| 44 | Supplementary Figure S16. HA variants at the antigenic sites of avian H1N1 IAVs of        |    |
| 45 | Anseriformes or Charadriiformes origin. ....                                              | 27 |
| 46 | Supplementary Figure S17. Observed variants mapped on the NA structure. ....              | 28 |
| 47 | Supplementary Figure S18. Variants mapped on the NP structure. ....                       | 29 |
| 48 | Supplementary Figure S19. The NS1-PI3K interface.....                                     | 30 |
| 49 | Supplementary Tables.....                                                                 | 31 |
| 50 | Supplementary Table S1. Pathogenicity and mortality rate of avian H1N1 IAVs with          |    |
| 51 | accompanying full-genome accession numbers .....                                          | 31 |

52 Supplementary Table S2. Polymorphic sites in the proteome of North American avian H1N1  
53 IAVs in association with their pathogenicity in DBA/2J mice by residue effect after adjusting  
54 for host effect ..... 32

55 Supplementary Table S3. Polymorphic sites in the proteome of North American avian H1N1  
56 IAVs in association with their pathogenicity in DBA/2J mice by host effect after adjusting for  
57 residue effect..... 36

58 Supplementary Table S4. Polymorphic sites in the proteome of North American avian H1N1  
59 IAVs affecting the pathogenicity of viruses in DBA/2J mice by host-residue interactions ..... 37

60 Supplementary Table S5. Polymorphic residues at HA antigenic sites of avian H1N1 IAVs  
61 compared to human and pandemic H1N1 viruses..... 38

62 Supplementary Table S6. Distribution of the GSEV PDZ-binding motif among various IAV  
63 subtypes from different hosts in publicly available NS1 sequences..... 39

64 Supplementary Table S7. Distribution of the GSEV motif in publicly available NS1 sequences  
65 in terms of isolation year, host, region, and subtype ..... 40

66 Supplementary References ..... 42

67

68

69

## 70 **Supplementary Results**

71 For statistical robustness, we excluded the genetic variants appearing as a singleton in  
72 our dataset. Therefore, in addition to the polymorphic sites that are identified associated with  
73 pathogenicity by Cox proportional hazard model, we also investigated the structural and  
74 functional importance of all observed variants in the proteome of avian H1N1 IAVs. We also  
75 manually checked the genomes of avian H1N1 IAVs for the presence of previously known  
76 adaptation, virulence, transmission, and drug resistance markers, as well as the antigenic  
77 similarities between avian and pandemic H1N1 IAVs.

78

## 79 **Polymerase proteins**

80 We identified 12 variants in the cap-binding domain of PB2 (residues 318-483)  
81 (Supplementary Fig. S12a), six of which (V338I, R340K, E342D, R355K, V356I, and E358V)  
82 were clustered within 10 Å of m<sup>7</sup>GTP (pre-mRNA cap analog) binding (Supplementary Fig.  
83 S12b). Interestingly, none of those six variants was observed in low-pathogenic strains (survival  
84 score ≥ 0.457, Supplementary Table 1). Variants surrounding m<sup>7</sup>GTP are not anticipated to  
85 drastically affect protein stability or solubility, because they were of similar physicochemical  
86 properties, surface exposed, and did not directly interact with the m<sup>7</sup>GTP. However, their  
87 positions in the structure indicated that they could slightly perturb and influence residues that  
88 line the m<sup>7</sup>GTP-binding pocket. Four of the 10 most pathogenic strains  
89 (A/mallard/ALB/119/1998, A/mallard/MN/AI07-3100/2007, A/mallard/ALB/201/1998, and  
90 A/mallard/ALB/88/2004) (Supplementary Table S1) contain variants in their cap-binding  
91 domains at their methyl guanylyltransferase (MGT)-binding pocket. Additionally, all viruses with  
92 the variants in the cap-binding domain belong to avian IAVs of the Anseriformes origin.  
93 Previously, it was shown that arginine and lysine variants at residue 355 at the cap-binding

94 domain of PB2 are related to high pathogenicity of H5N1 IAVs in mice models, and Q355 is  
95 associated with low pathogenicity<sup>1-3</sup>. Therefore, the arginine or lysine variants at residue 355 of  
96 31 avian H1N1 viruses may increase the virulence of the viruses in mice, although we cannot  
97 support this notion statistically due to the lack of statistical power (K355; n=1 and R355; n=30)  
98 variants in our sample set (Supplementary Fig. S1).

99 We detected six variants in the host-specific domain of PB2 (538-678 aa) of avian  
100 H1N1 viruses: four were surface exposed (D567A, G590S, V649I, and K660R), and two were  
101 buried (I553V and V667I). The variant V649I was identified in relation to increased pathogenicity  
102 in mice by residue effect using Cox proportional hazard model (Supplementary Table S2).  
103 Amino acid substitutions at residue 627 (glutamic acid to lysine) and 701 (aspartic acid to  
104 asparagine) are important in terms of mammalian adaptation of an avian virus<sup>4,5</sup>. All 31 North  
105 American avian H1N1 viruses carry avian-like E627 and D701 at those sites. However, the PB2  
106 protein of the 2009 pandemic H1N1 did not acquire the E627K or D701N mutation. Instead, the  
107 acquisition of mutations at other sites, such as G590S and Q591R (SR polymorphism), have  
108 been identified as compensatory of E627K substitution that enhances the viral replication and  
109 polymerase activity in mammalian cells<sup>6,7</sup>. In our dataset of 31 avian H1N1 IAVs, we observed  
110 the avian-like GQ motif at positions 590-591 of PB2 in 27 viruses; however, we detected SQ  
111 motif in five of 31 viruses (A/mallard/ALB/88/2004, A/mallard/MN/Sg-00121/2007,  
112 A/mallard/ALB/267/1996, A/mallard/MN/AI07-3018/2007, and A/blue winged teal/LA/B228/1986)  
113 due to the G590S substitution. Thus, over the years, some avian H1N1 viruses have been one  
114 step closer to acquiring SR polymorphism, as seen in the 2009 pandemic virus.

115 We detected 16 polymorphic sites at the C-terminal region of the PB1-F2 transcript of  
116 North American avian H1N1 viruses, but we could not extrapolate the functional importance of  
117 those residues. Notably, the N66S substitution on PB1-F2 increases the virulence of H5N1 and  
118 1918 H1N1 viruses<sup>8</sup>. Among the North American avian H1N1 IAVs, 29 of 31 carry S66; only

119 two (*A/blue winged teal/LA/B228/1986* and *A/shorebird/DE/274/2009*) carry N66  
120 (Supplementary Fig. S3). The latter two viruses were among the low pathogenic viruses with  
121 survival scores 0.457 and 0.571, respectively (Supplementary Table S1). So, S66 in the PB1-  
122 F2 of avian H1N1 IAVs might explain the increased virulence of most of the viruses in the  
123 mouse model.

124 Using the available crystal structures of PA, we structurally investigated the variants for  
125 importance, with the majority of variants (26 of 33) being detected in the C-terminal PA-PB1-  
126 binding site (Supplementary Figs. S4, S13). Most of the residues were present on the protein  
127 surface, and seven variants (V323I, P332S, A337T, V542I, L543I, I545V, and V565I) clustered  
128 within 10Å of each other (Supplementary Fig. S13a). Variants V323I and I545V in PA coevolved  
129 in most of the viruses, and given their location in the core of the protein might compensate for  
130 each other to stabilize the molecule (Table 2 and Supplementary Fig. 13a). Human-like  
131 signatures D382 and N409 were observed in several avian H1N1 IAVs<sup>9</sup>. Among the 31 avian  
132 H1N1 viruses, four (*A/mallard/MN/AI07-3127/2007*, *A/mallard/MO/466554-14/2008*,  
133 *A/mallard/MN/AI07-3140/2007*, and *A/shorebird/DE/274/2009*) carried the human-like D382 on  
134 the PA protein, and four others (*A/shorebird/DE/300/2009*, *A/shorebird/DE/324/2009*,  
135 *A/shorebird/DE/170/2009*, and *A/shorebird/DE/318/2009*) carried human-like N409. The  
136 increased length of N409 might interact weakly with PB1, which would not occur with the  
137 smaller S409 (Supplementary Fig. S13b). Therefore, S409N might provide an additional  
138 stabilizing contact between PA and PB1. Overall, five of the six avian H1N1 viruses of  
139 Charadriiformes origin had one or the other human-like residue in their PA that might increase  
140 their pathogenicity in mammalian models.

141 Seven variants were detected in the N-terminal endonuclease domain of PA (residues 1-  
142 197) (Supplementary Fig. S4). None of the variants were located directly in the catalytic site, but  
143 two were adjacent (I118V and T162I). Structurally, these variants were anticipated to affect the

144 stability of the secondary shell, but they did not appear to drastically disrupt the orientation of  
145 residues lining the binding pocket (Supplementary Fig. S14).

146

## 147 **Surface glycoproteins**

148 Avian H1N1 IAVs have seven conserved glycosylation sites at residues 22, 23, 40, 104,  
149 304, 498, and 557 in their HA. It is not clear whether the viruses use both glycosylation sites at  
150 residues 22 and 23, or if residue 23 is only used alternatively. Using the available crystal  
151 structures, we modeled 40 variants: 32 in the head domain and eight in the stalk domain  
152 (Supplementary Fig. S15a). Ten of the 25 variants in the globular head (residues 59-292) were  
153 observed at antigenic sites, and 15 were at nonantigenic sites. All H1N1 viruses isolated from  
154 Charadriiformes displayed four variants (E132Q, A137S, T169I, and K236Q) that co-occurred.  
155 The T169I substitution was also observed in eight viruses of Anseriformes origin. Four of the 25  
156 variants in the globular head were in the receptor-binding site (I168L, T169I, L208I, and I266V)  
157 (Supplementary Fig. S15b). Residues 169, 208, and 266 would influence carbohydrate  
158 interactions, and residue 168 would influence residues on the surface of the Sa antigenic site.  
159 The T169I variant is the only one seen in almost half of the viruses. The side chain faces the  
160 binding site altering carbohydrate-protein interactions.

161 We determined the distribution of the variants at the antigenic sites (Supplementary Fig.  
162 S16) for several selected viruses from the most pathogenic group in DBA/2J mice. Eleven of the  
163 variants at the nonantigenic sites (60, 132, 137, 138, 169, 188, 213, 228, 236, 279, and 286)  
164 were surface exposed, and four (125, 168, 266, and 289) were buried. We did not observe a  
165 defined pattern in the distribution of the variants at nonantigenic sites of the H1N1 viruses of  
166 Anseriformes origin. However, we observed localized and enriched variants at the nonantigenic  
167 sites of H1N1 viruses of Charadriiformes origin (Supplementary Fig. S16f).

168 We examined the residues at the HA antigenic sites based on the variations observed  
169 between human H1N1 IAVs throughout the years and pandemic H1N1 viruses (1918 and 2009)  
170 <sup>10</sup> and compared those with avian H1N1 IAVs. Of the 50 residues found at the antigenic sites of  
171 HA (Sa, Sb, Ca, and Cb), 21 residues appeared to be conserved among human, avian, and  
172 pandemic H1N1 IAVs. North American avian H1N1 IAVs were similar to both 1918 and 2009  
173 pandemic viruses at 13 residues (K170, G172, S174, and K177 in Sa; G187 in Ca; T201, Q206,  
174 S207, L208, Q210, and N211 in Sb; and T89 and A90 in Cb), while human H1N1 viruses  
175 showed variations throughout the years. We observed similarities to either pandemic virus at  
176 some other positions. For instance, avian H1N1 IAVs carry five additional residues identical to  
177 those in the 1918 virus (Y155, S159, N185, and K222 in Ca; and L88 in Cb) but not those in  
178 human H1N1 or 2009 pandemic virus. Similarly, these viruses carry residues identical to those  
179 of the 2009 pandemic virus (N173 in the Sa antigenic site in H1N1 IAVs of Anseriformes and  
180 Charadriiformes origin, and P154 in the Ca antigenic site only in H1N1 IAVs of Charadriiformes  
181 origin). On the basis of 10 polymorphic residues identified at the HA antigenic sites of avian  
182 H1N1 IAVs, we did not observe any significant difference between H1N1 viruses of  
183 Anseriformes and Charadriiformes origin in terms of their antigenic similarity to either pandemic  
184 virus (Supplementary Table S5).

185 Seven glycosylation sites were detected in the NA protein of North American avian  
186 H1N1 viruses at residues 50, 58, 63, 68, 88, 146, and 235. Six of these were observed in all 31  
187 H1N1 viruses, but the glycosylation site at residue 68 was lost in two viruses  
188 (*A/mallard/MN/AI07-3127/2007* and *A/mallard/MN/AI07-3140/2007*) due to a S70N substitution.  
189 Five of the polymorphic sites (260, 262, 416, 449, and 450) were surface exposed and observed  
190 near the interface between monomers (Supplementary Fig. S17b).

191 The effect of the variants on oligomerization was most likely small due to the variable  
192 nature of the positions. Two variable residues (385 and 386) were positioned in a loop that



193 coordinates  $\text{Ca}^{+2}$  binding (Supplementary Fig. S17c) which is important for stabilizing the NA  
194 protein <sup>11</sup>. Residues in position 386 help coordinate  $\text{Ca}^{+2}$  via backbone interactions, indicating  
195 that small changes in the side chain can be tolerated. One avian H1N1 virus,  
196 A/pintail/ALB/210/2002, contained the R430K variant. This variant was not a drastic electrostatic  
197 or stereochemical change, but it does occur adjacent to the residues on the “150 loop”, which  
198 forms a cavity adjacent to the catalytic pocket and is being explored as a target for antiviral  
199 inhibitors <sup>11,12</sup>. All the other variants (surface-exposed or buried) were similar in their  
200 physiochemical changes and did not appear to affect the function of the protein. We identified  
201 three variable sites (220, 221, and 430) surrounding the active site; however, none of those  
202 positions were directly involved in the formation of the active-site pocket.

203 All 31 North American avian H1N1 viruses in our study displayed H275 (274 in N2  
204 numbering) and N295 (294 in N2 numbering); therefore, these residues are probably sensitive  
205 to NA inhibitors. Stalk deletion in NA is known to facilitate the adaptation of avian IAVs to  
206 mammals. However, we did not detect deletion in the NA stalk of avian H1N1 IAVs.

207

## 208 **Nucleoprotein**

209 We detected 22 polymorphic sites in the NP-coding region (Supplementary Fig. S7). Of  
210 those, only two (143 and 478) were associated with decreased pathogenicity in two H1N1  
211 viruses of Anseriformes origin after adjusting the residue effect (adjusted  $P$  (FDR) = 9.50E-03;  
212 Supplementary Table S3).

213 The NP protein contains a perpendicular helix that divides the protein into two regions,  
214 the head and body. RNA is thought to bind along the perpendicular helix of NP (Supplementary  
215 Fig. S18), which contains five (23%) of the NP variants (D128E, L133I, L136M, L143M, and  
216 A146S) that are in viruses with lower pathogenicity. Substitutions at two of these residues

217 (L136M in A/blue winged teal/LA/B228/1986 and A/mallard/MN/AI07-3140/2007 and L143M in  
218 A/mallard/MN/Sg-00627/2008 and A/mallard/MN/Sg-00628) appeared to enlarge the side chain  
219 slightly, which might affect the stability of the helix and RNA binding. The variant S478P is  
220 surface exposed and present at the C terminus of the protein (data not shown).

221

## 222 **Matrix and nonstructural proteins**

223 The variants in M1 (S70N and N85D) were not located on the nuclear-localization signal  
224 (residues 101-105) or on the NEP-interaction interface. Both were solvent exposed, and their  
225 effect on function is unknown. V27A, A30S, and S31N substitutions were previously described  
226 as amantadine resistance markers in M2<sup>13</sup>. None of the 31 North American avian H1N1 viruses  
227 in our study contained these markers; therefore, they are predicted to be sensitive to  
228 amantadine.

229 In terms of the structural and functional importance of each substitution in NS1 on the  
230 pathogenicity of viruses, our main focus was on the effector domain (residues 74-230), because  
231 it affects various key functions by binding the host cell's proteins<sup>12</sup>. Key variants were identified  
232 at the PDZ-ligand motif, the nuclear-export signal, and the dimer interface. On the basis of  
233 interface interactions between NS1 and PI3K domain, we identified six interactions (Y89, R96,  
234 S99, D101, R118, and E159) that participate in hydrogen-bond interactions with the PI3K-  
235 inhibitory domain (Supplementary Fig. S19a), two of which (D101E and R118K) were present in  
236 all pathogenic viruses. Six of the remaining 11 hydrophobic interactions were observed variants  
237 in avian H1N1 IAVs (S87, L95, M98, I145, L146, and S161). The variant R118K might allow  
238 closer packing of the PI3K helix to the NS1 protein (Table 2 and Supplementary Fig. S18)  
239 possibly by a decrease in the steric size at residue 118 due to the arginine-to-lysine substitution.

240 We observed E227G substitution in NS1 of three pathogenic H1N1 IAVs of  
241 Charadriiformes origin. We then assessed all 195 full-length NS1 sequences with a GSEV motif  
242 that were on the NCBI Influenza Virus Resources database to identify the hosts and virus  
243 subtypes in which the GSEV motifs were located at the 3' end of the ORF. Of the NS1  
244 sequences with a GSEV motif, 78.5% were detected in avian IAVs; 35.9% belonged to the  
245 H5N1 subtype (Supplementary Table S6); and 29.4% were isolated from highly pathogenic  
246 avian H5N1 viruses. The circulation of a GSEV PDZ-binding domain in IAVs of various regions  
247 and hosts over the years (Supplementary Table S7) allows us to speculate that the GSEV motif  
248 appeared in the early 1980s in Eurasian swine with transitory occurrence in avian subtypes  
249 through the years until 2006. That year, GSEV was acquired mainly by Charadriiformes from  
250 Eurasia and North America, as well as by a Eurasian H5N1 virus that was highly pathogenic. In  
251 2007, GSEV was circulating in highly pathogenic H5N1 viruses that were isolated from birds,  
252 humans, and pikas. In 2009, GSEV circulation peaked in the IAVs of Charadriiformes origin,  
253 including the three H1N1 viruses with a GSEV motif investigated in this study. Today, GSEV still  
254 circulates in IAVs of Charadriiformes origin and in some H9N2 viruses from Eurasia <sup>14</sup>.

255

256 **Supplementary Figures**

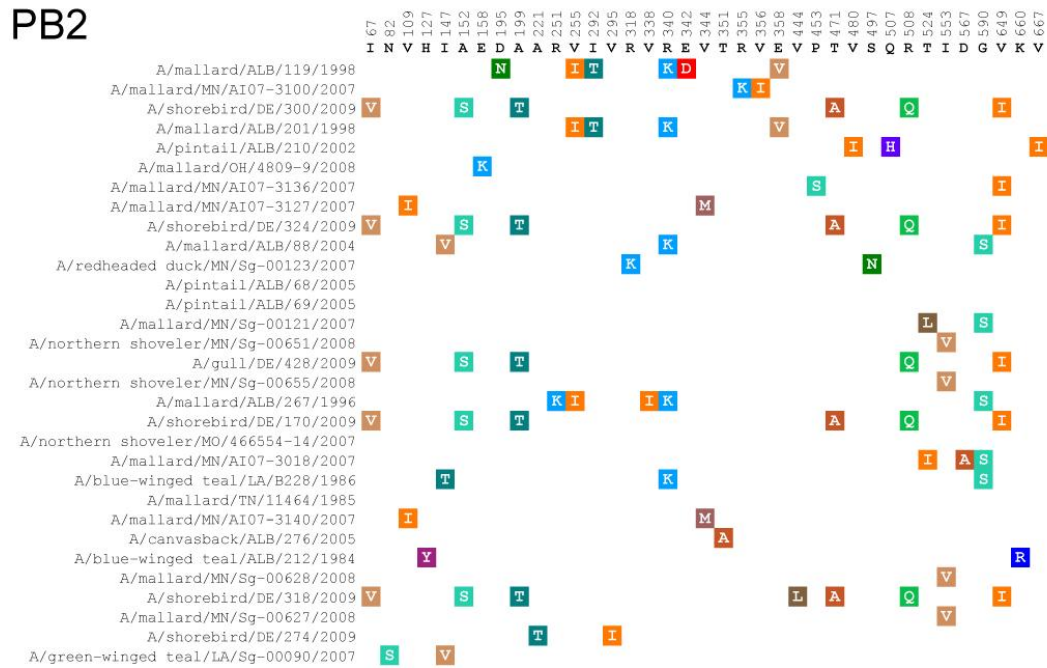

257

258 **Supplementary Figure S1.** Polymorphic residues in the PB2-coding region. These positions  
 259 were based on the sequences used in this study.

260

# PB1

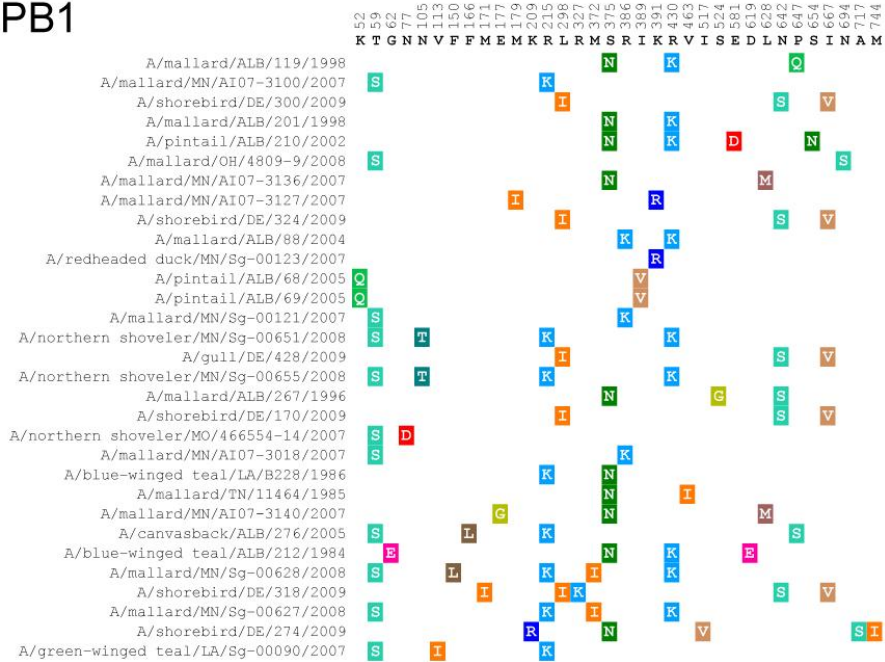

261

262 **Supplementary Figure S2.** Polymorphic residues in the PB1-coding region. These positions  
 263 were based on the sequences used in this study.

264

# PB1-F2

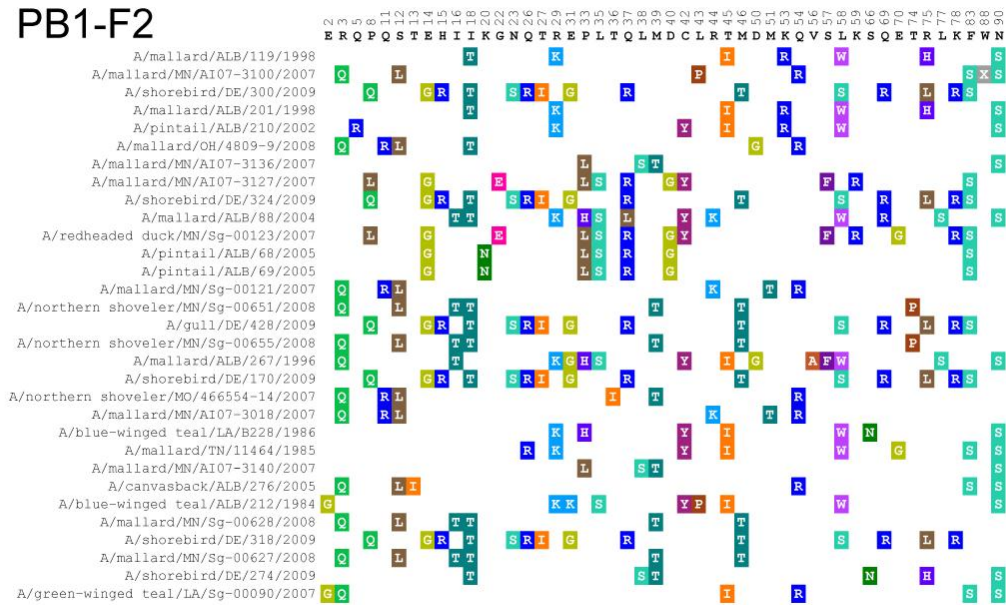

265

266 **Supplementary Figure S3.** Polymorphic residues in the PB1-F2-coding region. These

267 positions were based on the sequences used in this study.

268

PA

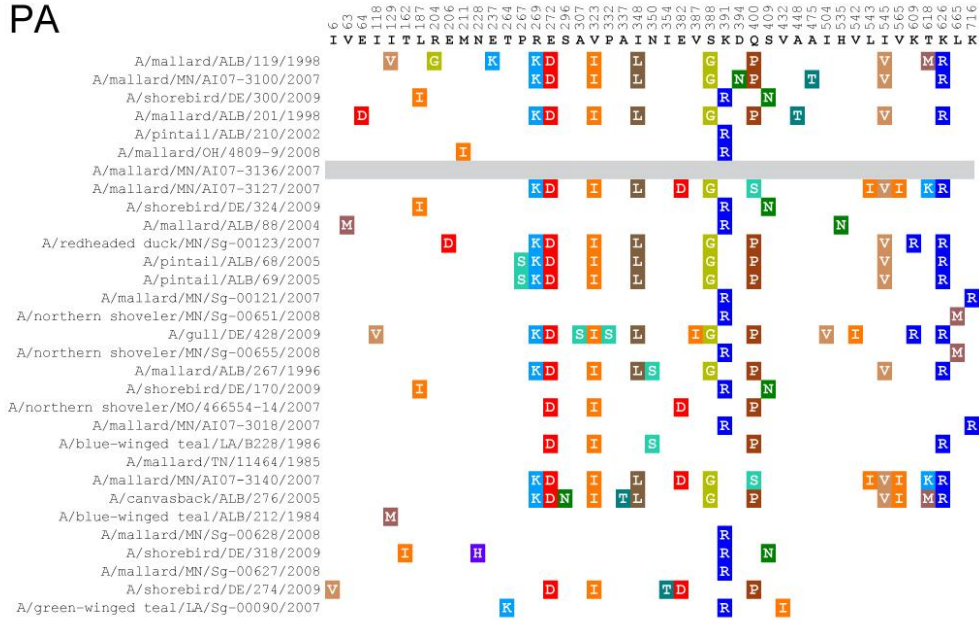

269

270 **Supplementary Figure S4.** Polymorphic residues in the PA-coding region. The PA sequence  
271 for A/mallard/MN/AI07-3136/2007 (shown in gray) is excluded due to high number of ambiguous  
272 positions. These positions were based on the sequences used in this study.

273

# PA-X

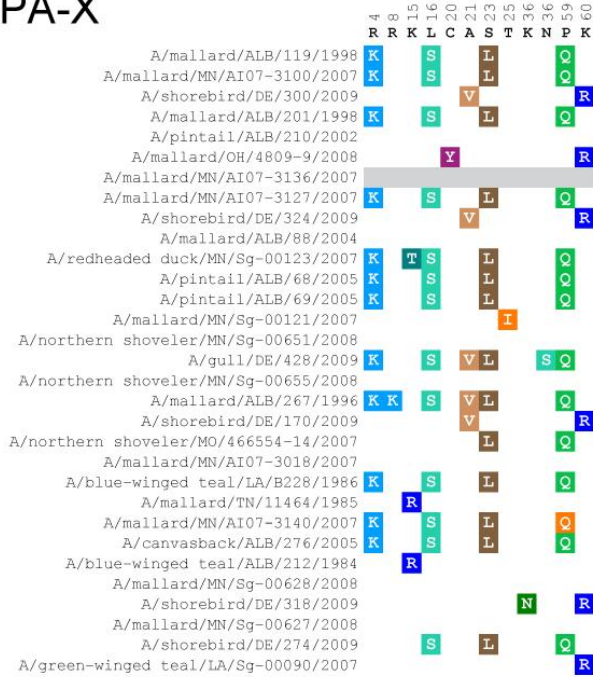

274

275 **Supplementary Figure S5.** Polymorphic residues in the 61-aa C terminus of the PA-X-coding  
 276 region. The PA sequence for A/mallard/MN/AI07-3136/2007 (shown in gray) is excluded due to  
 277 high number of ambiguous positions. These positions were based on the sequences used in  
 278 this study.

279



# HA

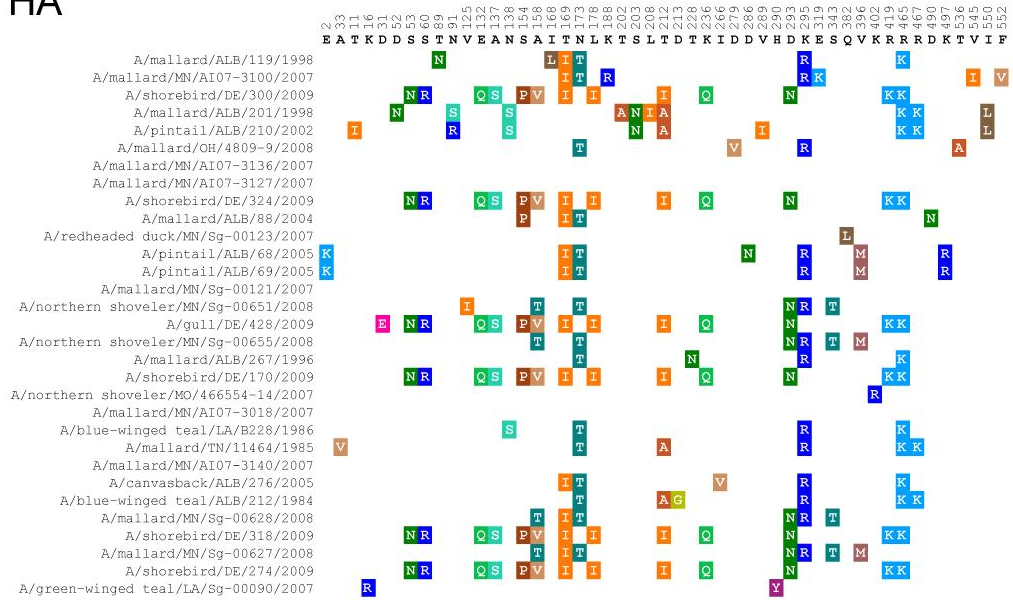

280

281 **Supplementary Figure S6.** Polymorphic residues in the HA-coding region. These positions

282 were based on the sequences used in this study.

283

# NP

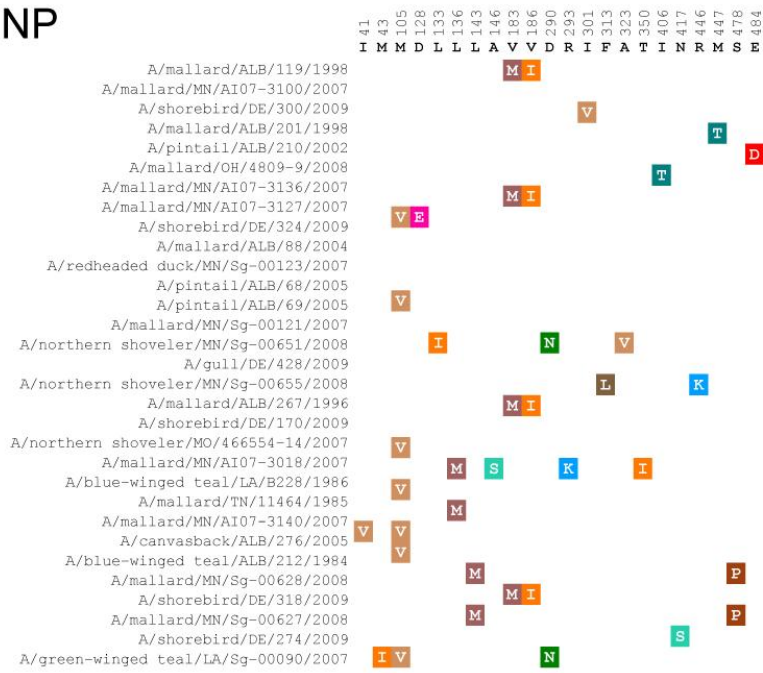

284

285 **Supplementary Figure S7.** Polymorphic residues in the NP-coding region. These positions  
 286 were based on the sequences used in this study.

287

NA

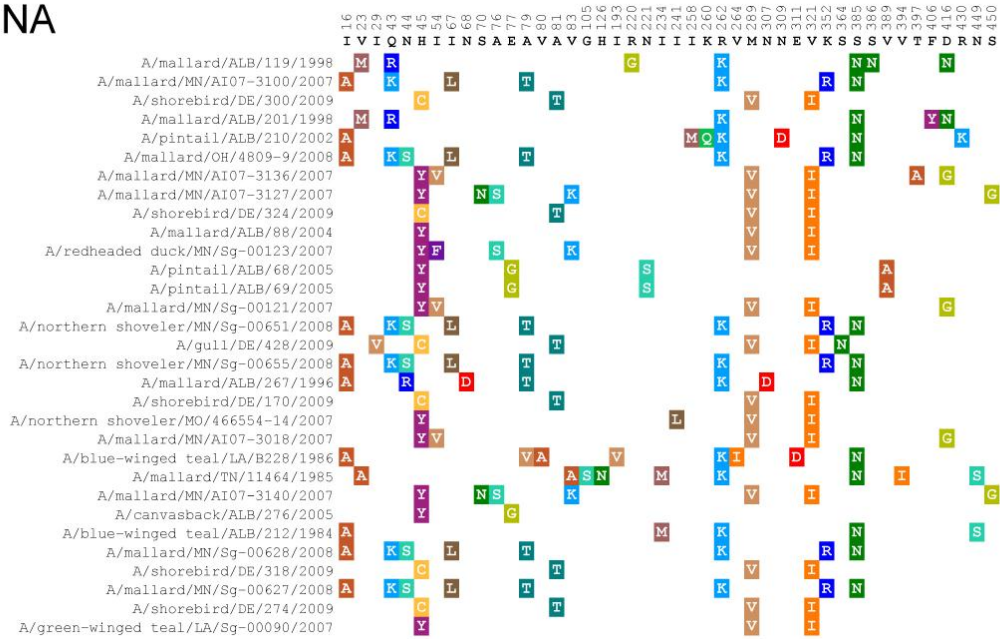

288

289 **Supplementary Figure S8.** Polymorphic residues in the NA-coding region. These positions  
290 were based on the sequences used in this study.

291

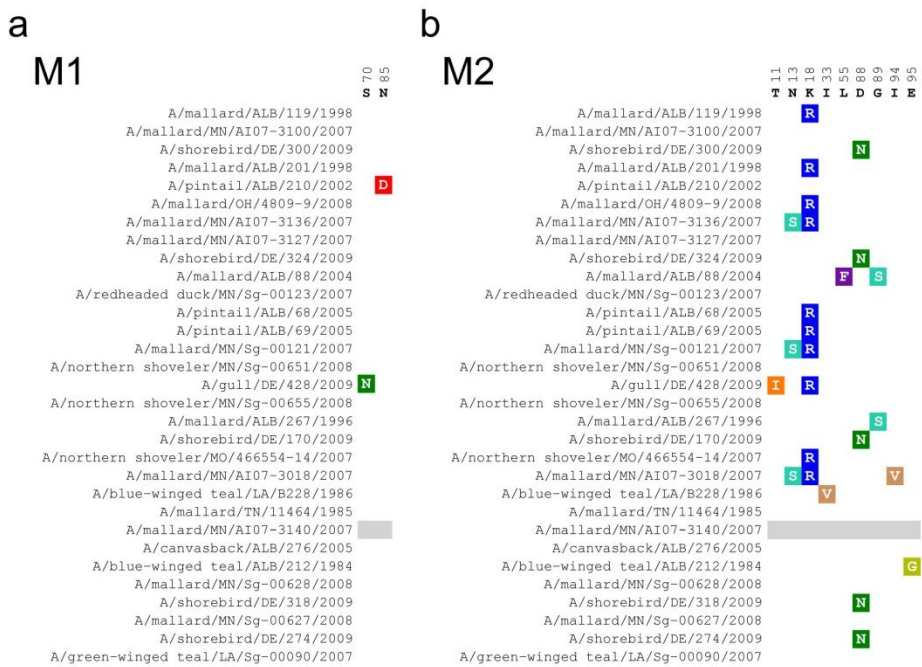

292

293 **Supplementary Figure S9.** Polymorphic residues in the **(a)** M1- and **(b)** M2-coding regions.

294 The M sequence for *A/mallard/MN/AI07-3140/2007* (shown in gray) is excluded due to high  
295 number of ambiguous positions. These positions were based on the sequences used in this  
296 study.

297

298

# NS1

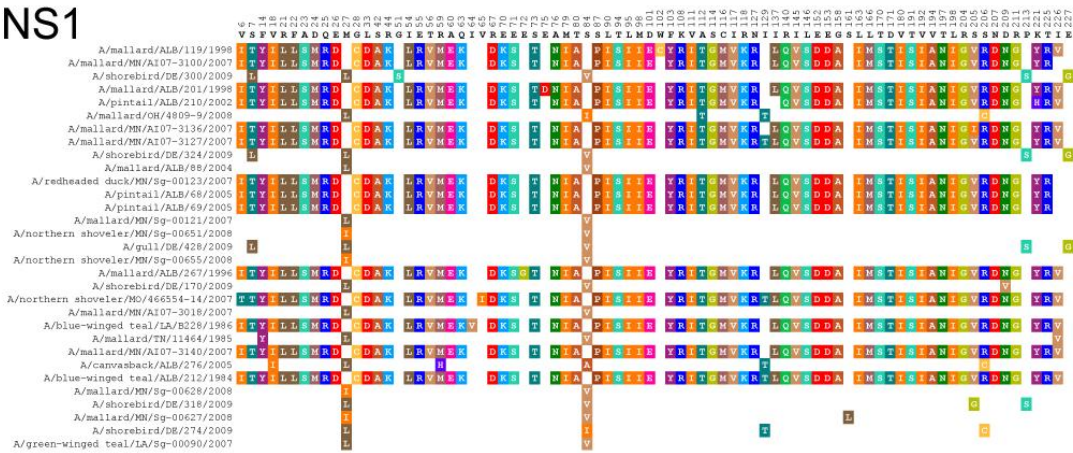

299

300 **Supplementary Figure S10.** Polymorphic residues in the NS1-coding region. These positions

301 were based on the sequences used in this study.

302

# NEP

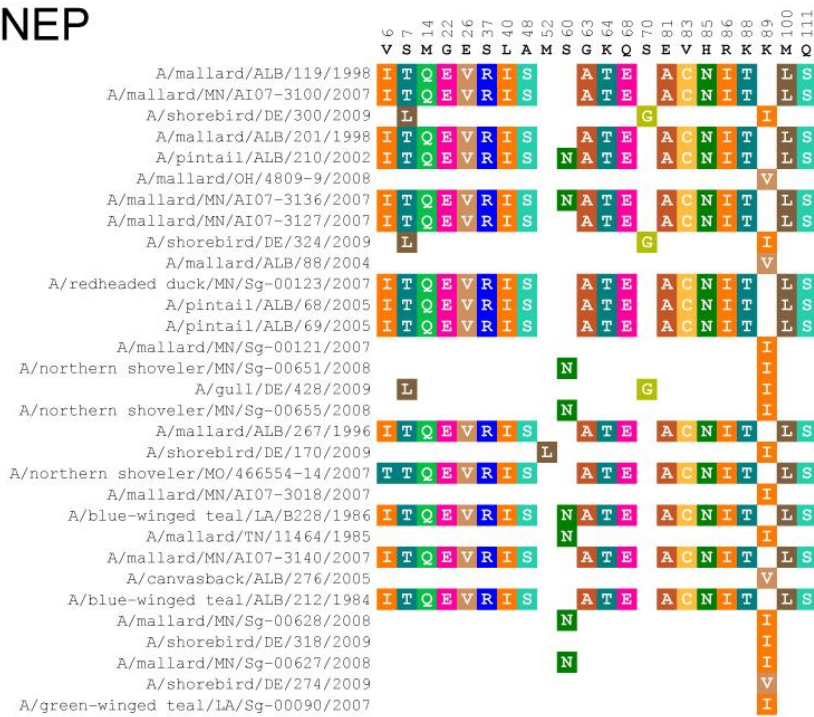

303

304 **Supplementary Figure S11.** Polymorphic residues in the NEP-coding region. These positions  
 305 were based on the sequences used in this study.

306

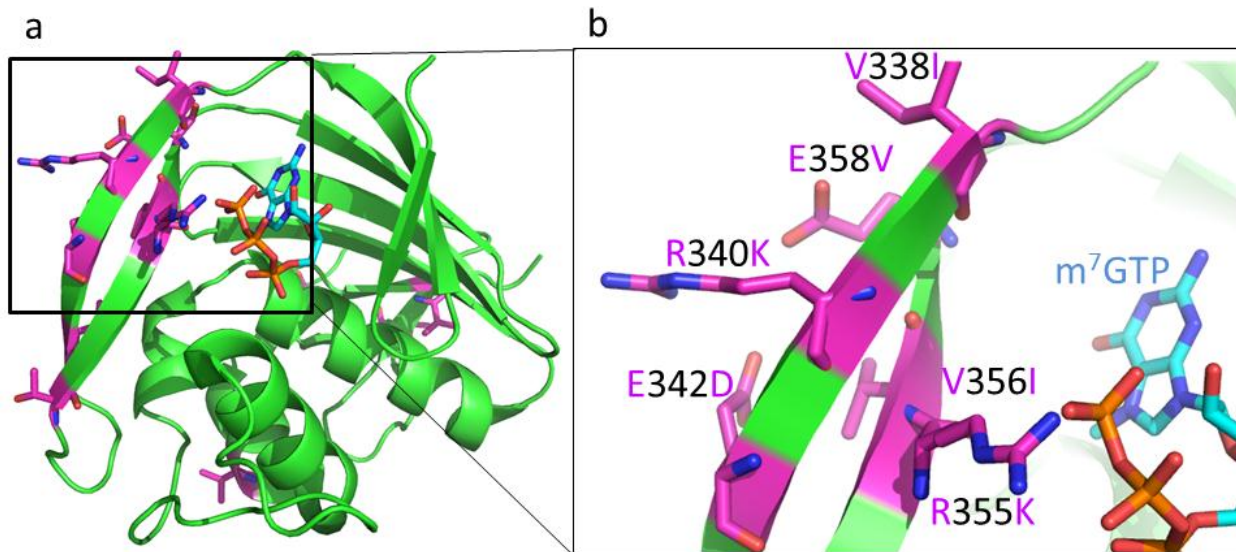

307

308 **Supplementary Figure S12.** Variants in the cap-binding domain of PB2 in avian H1N1 IAVs.

309 **(a)** Ribbon models of the structure of PB2 (green; [PDB: 2VQZ]) with 12 variants (magenta  
 310 sticks) located in the cap-binding domain and bound to the pre-mRNA–cap analog (teal stick).

311 **(b)** Six variants (I338, E358, R340, E342, R355, and V356) in the PB2 protein that cluster within  
 312 approximately 10 Å of the bound pre-mRNA–cap analog ( $m^7GTP$ ). These positions were based  
 313 on the sequences used in this study.

314

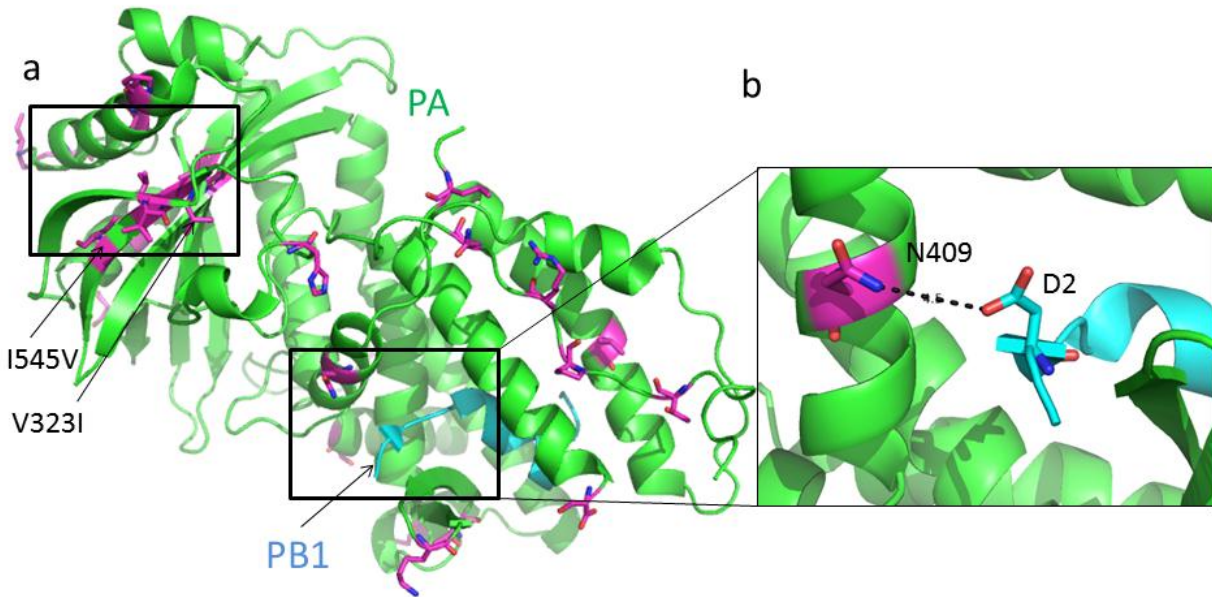

315

316 **Supplementary Figure S13.** Variants in the PA-PB1-binding site of avian H1N1 IAVs. **(a)**  
 317 Model of the C-terminal domain of PA (green; [PDB: 3CM8]) bound to the N-terminal peptide  
 318 (teal) of PB1. Observed variants are shown (magenta sticks). Of note, a cluster (<10 Å) of  
 319 seven variants (V323I, P332S, A337T, V542I, L543I, I545V, and V565I) are observed (black  
 320 boxes). **(b)** Region around variant N409 on PA and D2 on PB1. Potential interaction is shown as  
 321 a black dotted line. These positions were based on the sequences used in this study.

322



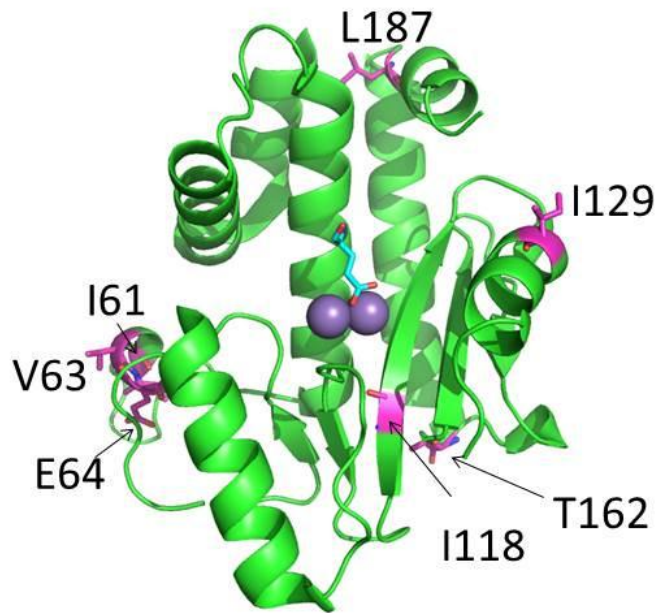

323

324 **Supplementary Figure S14.** Variants in the PA N terminus of avian H1N1 IAVs. The seven  
325 variants are indicated (magenta sticks) and labeled within the PA endonuclease domain (green;  
326 [PDB: 2W69]). Manganese ions are shown as purple spheres, and the bound substrate is  
327 shown as a teal stick. These positions were based on the sequences used in this study.

328

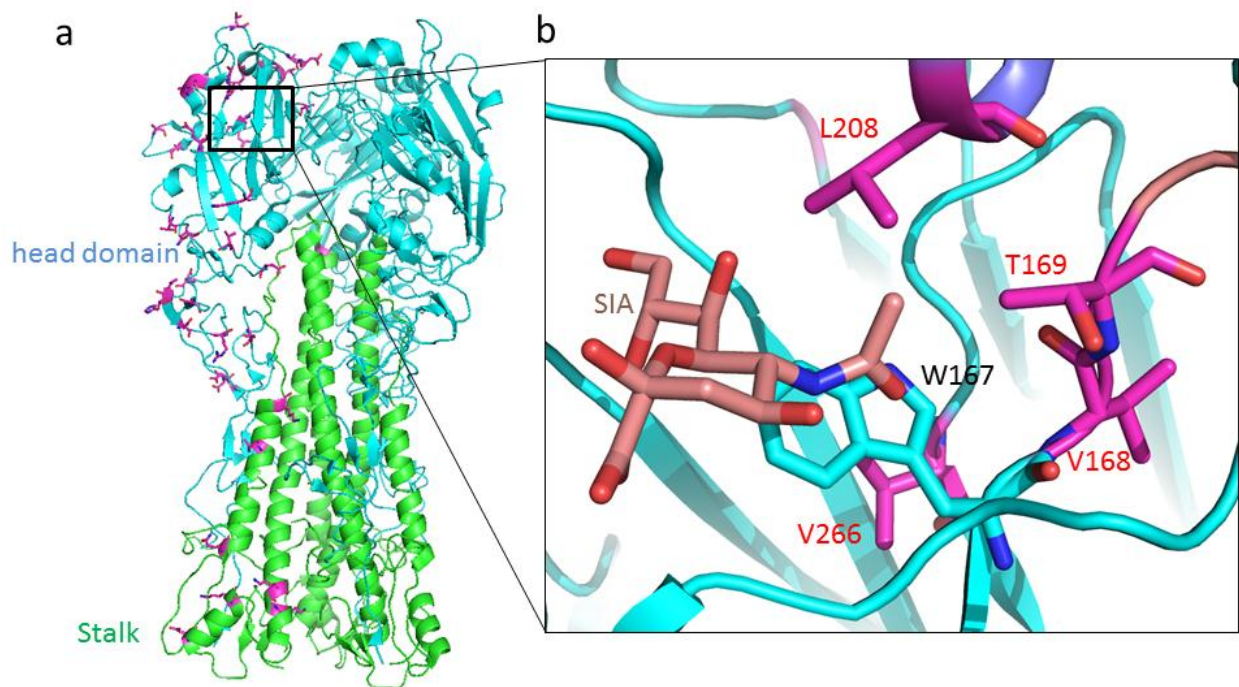

329

330 **Supplementary Figure S15.** The ribbon model of the structure of avian H1 hemagglutinin (HA).

331 **(a)** Structural tetramer [PDB: 2WRH] of the HA protein in which the head (teal) and stalk (green)

332 domains are labeled. Observed variants are indicated (magenta sticks) on only the monomer of

333 the head and stalk domains. The carbohydrate receptor-binding site is indicated by a black box.

334 **(b)** Region surrounding the receptor-binding site includes variant L208 in the Sb antigenic site,

335 and variants T169, V168, and V266 are nonantigenic. Both carbohydrates (SIA) are visualized

336 as a peach stick. The locations of variants discussed in the text are labeled in red. These

337 positions were based on the sequences used in this study.

338

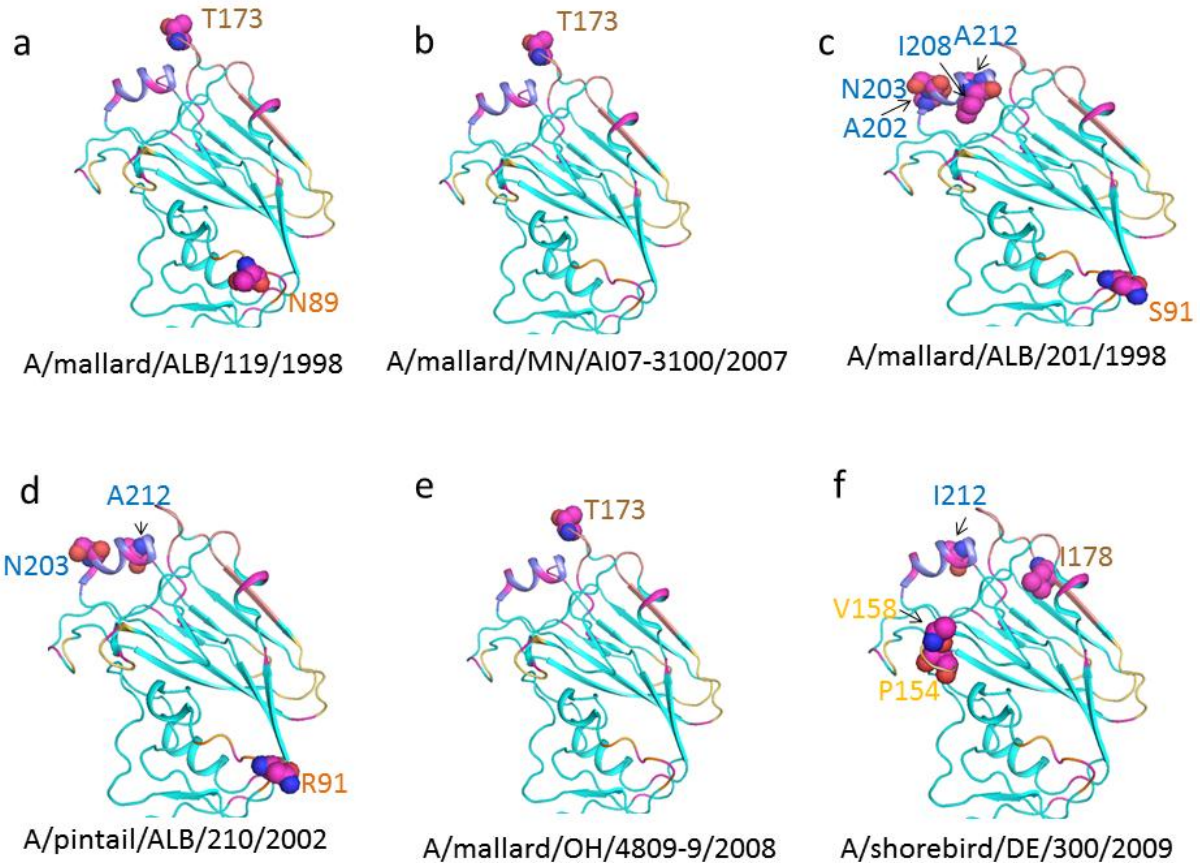

339

340 **Supplementary Figure S16.** HA variants at the antigenic sites of avian H1N1 IAVs of  
 341 Anseriformes or Charadriiformes origin. Ribbon models indicate the variant epitopes in HA  
 342 antigenic sites (colors and structures are the same as those in Fig. 3). The residues associated  
 343 with increased pathogenicity are labeled (magenta space-filled spheres) on the HA of the most  
 344 pathogenic avian H1N1 IAVs of Anseriformes origin: **(a)** A/mallard/ALB/119/1998, **(b)**  
 345 A/mallard/MN/AI07-3100/2007, **(c)** A/mallard/ALB/201/1998, **(d)** A/pintail/ALB/210/2002, and **(e)**  
 346 A/mallard/OH/4809-9/2008. **(f)** Those associated with increased pathogenicity on the HA of the  
 347 most pathogenic H1N1 IAV, of Charadriiformes origin, A/shorebird/DE/300/2009, are also noted.  
 348 A small difference in variant epitopes was observed between the Ans and Char IAVs. These  
 349 positions were based on the sequences used in this study.

350

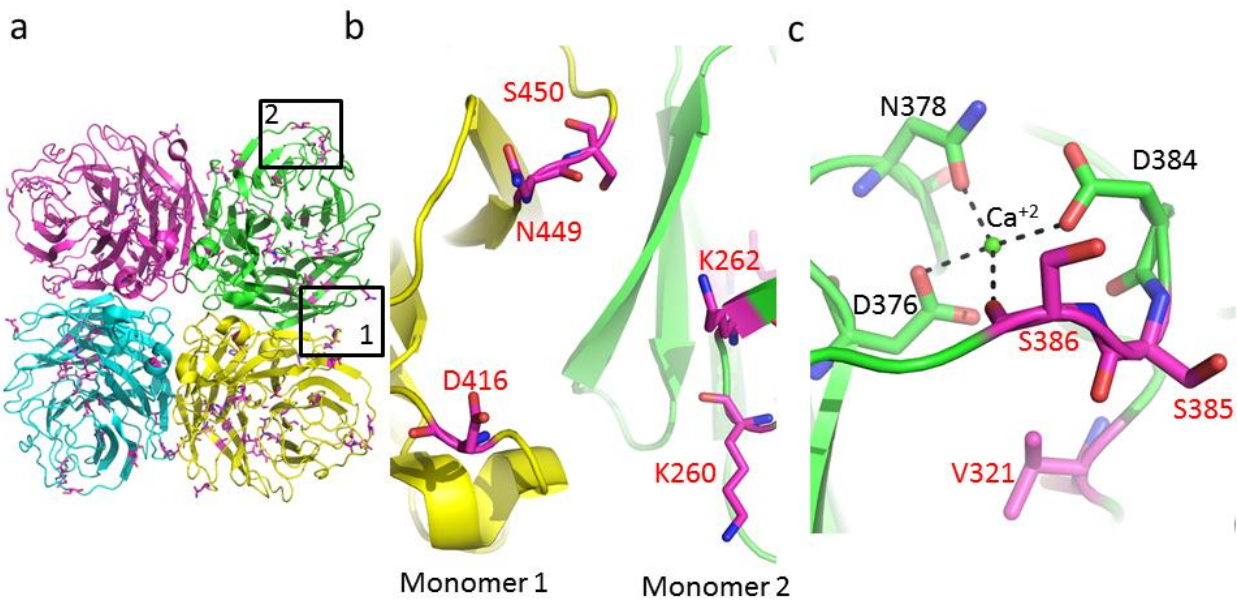

351

352 **Supplementary Figure S17.** Observed variants mapped on the NA structure. **(a)** Variants  
 353 observed within the biological tetramer of protein NA [PDB: 2HTY]. Interesting variant locations  
 354 are labeled (1: dimer interface, 2: calcium-binding site) and boxed in black. **(b)** Variants on the  
 355 protein-protein interface in the tetramer between monomers 1 (yellow) and 2 (green) are  
 356 indicated by purple sticks and red text. **(c)** Variants observed in a Ca<sup>2+</sup>-binding site are indicated  
 357 by green sticks and black text [PDB: 3B7E]. Coordinating interactions with Ca<sup>2+</sup> are represented  
 358 as black dotted lines. These positions were based on the sequences used in this study.

359

360

361

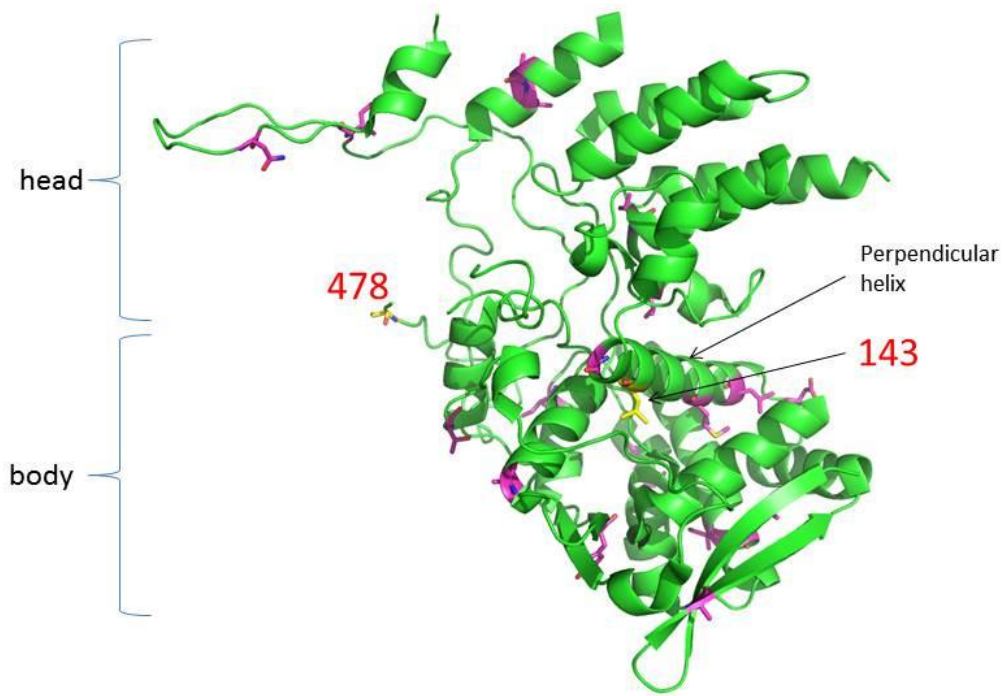

362

363 **Supplementary Figure S18.** Variants mapped on the NP structure. Crystal structure of the NP  
364 protein (green; [PDB: 3RO5]) with variant positions (magenta sticks). The protein can be  
365 subdivided into two domains (the head and body) separated by a perpendicular helix. Variants  
366 at positions 143 and 478 are associated with decreased pathogenicity (yellow sticks). These  
367 positions were based on the sequences used in this study.

368

369

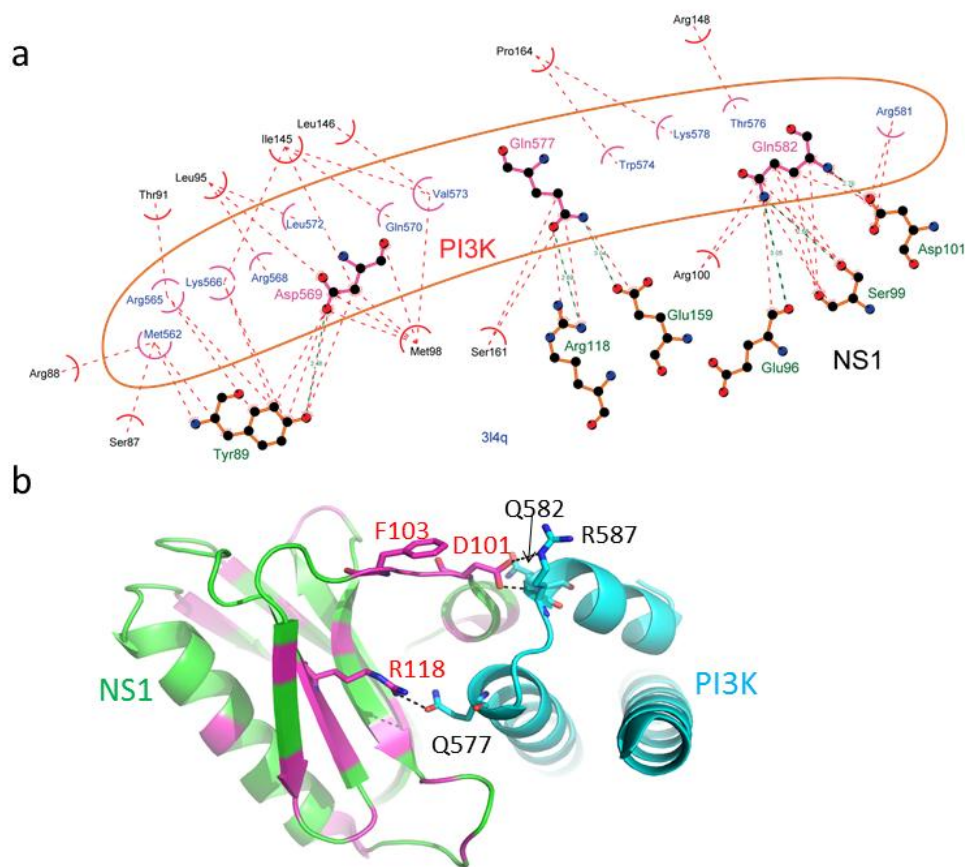

370

371 **Supplementary Figure S19.** The NS1-PI3K interface. **(a)** Interface interactions between NS1  
 372 (outside the circle) bound to the PI3K inhibitory domain (inside the circle; [PDB: 3L4Q]). Amino  
 373 acids shown as whole atoms are involved in hydrogen bonding, and those shown as spiked  
 374 semicircles participate in hydrophobic interactions. Green dotted lines connect amino acids  
 375 involved in hydrogen bonding, and red dotted lines connect those involved in hydrophobic  
 376 interactions. The six residues involved in hydrogen bonding are Y89, R96, S99, D101, R118,  
 377 and E159. **(b)** Ribbon model of the interaction between NS1 and the PI3K inhibitory domain.  
 378 Variants observed in NS1 (magenta) and those in NS1 that are discussed in the text (red –sticks  
 379 and text) are labeled. Variants in PI3K are indicated in black text, and interactions between the  
 380 residues are indicated in black-dotted lines. These positions were based on the sequences used  
 381 in this study.

382 **Supplementary Tables**

383 **Supplementary Table S1.** Pathogenicity and mortality rate of avian H1N1 IAVs with  
 384 accompanying full-genome accession numbers

| Influenza A virus isolate                         | Mortality (%) | Survival score <sup>a</sup> | Pathogenicity Index (PI) <sup>b</sup> | Accession numbers <sup>c</sup> |
|---------------------------------------------------|---------------|-----------------------------|---------------------------------------|--------------------------------|
| A/mallard/ALB/119/1998                            | 100           | 0.286                       | 4                                     | KF424175-182                   |
| A/mallard/MN/AI07-3100/2007                       | 100           | 0.286                       | 4                                     | KF424015-022                   |
| A/shorebird/DE/300/2009                           | 100           | 0.309                       | 4                                     | KF424127-134                   |
| A/mallard/ALB/201/1998                            | 100           | 0.320                       | 4                                     | KF424047-054                   |
| A/pintail/ALB/210/2002                            | 100           | 0.343                       | 4                                     | KF424111-118                   |
| A/mallard/OH/4809-9/2008                          | 100           | 0.343                       | 4                                     | KF424151-158                   |
| A/mallard/MN/AI07-3136/2007                       | 100           | 0.343                       | 4                                     | KF424167-174                   |
| A/mallard/MN/AI07-3127/2007 <sup>d</sup>          | 100           | 0.343                       | 4                                     | KF424207-214                   |
| A/shorebird/DE/324/2009                           | 100           | 0.377                       | 4                                     | KF424079-086                   |
| A/mallard/ALB/88/2004                             | 100           | 0.366                       | 4                                     | KF424039-046                   |
| A/redheaded duck/MN/Sg-00123/2007                 | 100           | 0.400                       | 3                                     | KF424191-198                   |
| A/pintail/ALB/68/2005 <sup>d</sup>                | 100           | 0.400                       | 3                                     | KF424215-222                   |
| A/pintail/ALB/69/2005                             | 100           | 0.400                       | 3                                     | KF424103-110                   |
| A/mallard/MN/Sg-00121/2007 <sup>d</sup>           | 100           | 0.400                       | 3                                     | KF424239-246                   |
| A/northern shoveler/MN/Sg-00651/2008              | 100           | 0.400                       | 3                                     | KF424031-038                   |
| A/gull/DE/428/2009                                | 100           | 0.400                       | 3                                     | KF424023-030                   |
| A/northern shoveler/MN/Sg-00655/2008 <sup>d</sup> | 100           | 0.400                       | 3                                     | KF424247-254                   |
| A/mallard/ALB/267/1996                            | 100           | 0.400                       | 3                                     | KF424095-102                   |
| A/shorebird/DE/170/2009                           | 100           | 0.400                       | 3                                     | KF424071-078                   |
| A/northern shoveler/MO/466554-14/2007             | 100           | 0.411                       | 3                                     | KF424119-126                   |
| A/mallard/MN/AI07-3018/2007 <sup>d</sup>          | 100           | 0.423                       | 3                                     | KF424199-206                   |
| A/blue-winged teal/LA/B228/1986                   | 100           | 0.457                       | 3                                     | KF424183-190                   |
| A/mallard/TN/11464/1985                           | 100           | 0.457                       | 3                                     | KF424143-150                   |
| A/mallard/MN/AI07-3140/2007 <sup>d</sup>          | 100           | 0.457                       | 3                                     | KF424255-262                   |
| A/canvasback/ALB/276/2005                         | 100           | 0.457                       | 3                                     | KF424159-166                   |
| A/blue-winged teal/ALB/212/1984 <sup>d</sup>      | 100           | 0.457                       | 3                                     | KF424231-238                   |
| A/mallard/MN/Sg-00628/2008                        | 100           | 0.457                       | 3                                     | KF424135-142                   |
| A/shorebird/DE/318/2009 <sup>d</sup>              | 100           | 0.514                       | 2                                     | KF424223-230                   |
| A/mallard/MN/Sg-00627/2008                        | 100           | 0.571                       | 2                                     | KF424055-062                   |
| A/shorebird/DE/274/2009                           | 100           | 0.571                       | 2                                     | KF424063-070                   |
| A/green-winged teal/LA/Sg-00090/2007              | 20            | 0.766                       | 1                                     | KF424087-094                   |

385 <sup>a</sup>The survival score is calculated as a function of percent survival by time [0.8 × (survival AUC/maximum AUC)<sup>15</sup>. Individual  
 386 mortality by time data for each mouse in each group is available upon request.

387 <sup>b</sup>PIs were classified as follows: 4, most pathogenic; 3, moderately pathogenic; 2, low pathogenic; 1, least pathogenic<sup>15</sup>.

388 <sup>c</sup>The GenBank accession numbers for the whole genome of each avian H1N1 IAVs (PB2, PB1, PA, HA, NP, NA, M, NS,  
 389 respectively).

390 **Supplementary Table S2.** Polymorphic sites in the proteome of North American avian H1N1 IAVs in association with their  
391 pathogenicity in DBA/2J mice by residue effect after adjusting for host effect

| coding region | position | aa distribution in *Ans*Char | totalGroup | nonreferenceResidue | AAcoef   | exp.AAcoef. | AApvalue | aaFDR    |
|---------------|----------|------------------------------|------------|---------------------|----------|-------------|----------|----------|
| NA            | 416      | D*19*6,G*3*0,N*2*0           | 3          | N                   | 2.506931 | 12.26722    | 4.20E-11 | 4.24E-09 |
| PB1-F2        | 53       | K*21*6,R*3*0                 | 2          | R                   | 2.201197 | 9.035823    | 1.87E-11 | 4.24E-09 |
| PB1-F2        | 75       | H*2*1,L*0*5,R*22*0           | 3          | R                   | -2.47556 | 0.0841161   | 5.11E-11 | 4.24E-09 |
| PB2           | 292      | I*22*6,T*2*0                 | 2          | T                   | 2.424705 | 11.2989     | 1.13E-10 | 5.63E-09 |
| PB2           | 358      | E*22*6,V*2*0                 | 2          | V                   | 2.424705 | 11.2989     | 1.13E-10 | 5.63E-09 |
| NA            | 43       | K*6*0,Q*16*6,R*2*0           | 3          | R                   | 2.632694 | 13.9112     | 2.27E-10 | 9.41E-09 |
| NEP           | 7        | L*0*3,S*10*3,T*14*0          | 3          | S                   | -2.04118 | 0.1298748   | 4.40E-07 | 1.37E-05 |
| NS1           | 7        | L*0*3,S*10*3,T*14*0          | 3          | S                   | -2.04118 | 0.1298748   | 4.40E-07 | 1.37E-05 |
| HA            | 203      | N*2*0,S*22*6                 | 2          | S                   | -1.72705 | 0.177809    | 2.25E-06 | 4.32E-05 |
| HA            | 550      | I*22*6,L*2*0                 | 2          | L                   | 1.727045 | 5.624013    | 2.25E-06 | 4.32E-05 |
| NEP           | 70       | G*0*3,S*24*3                 | 2          | S                   | -1.87937 | 0.1526867   | 2.04E-06 | 4.32E-05 |
| NS1           | 227      | E*24*3,G*0*3                 | 2          | G                   | 1.879367 | 6.549359    | 2.04E-06 | 4.32E-05 |
| PA            | 187      | I*0*3,L*24*3                 | 2          | L                   | -1.87937 | 0.1526867   | 2.04E-06 | 4.32E-05 |
| PB2           | 255      | I*3*0,V*21*6                 | 2          | V                   | -1.24868 | 0.2868838   | 1.37E-05 | 2.44E-04 |
| M2            | 18       | K*15*5,R*9*1                 | 2          | R                   | 0.826066 | 2.284315    | 3.06E-05 | 4.23E-04 |
| NS1           | 112      | A*9*6,T*15*0                 | 2          | T                   | 0.794422 | 2.213162    | 5.49E-05 | 7.19E-04 |
| NEP           | 14       | M*10*6,Q*14*0                | 2          | Q                   | 0.647753 | 1.911241    | 7.52E-04 | 1.87E-03 |
| NEP           | 22       | E*14*0,G*10*6                | 2          | G                   | -0.64775 | 0.5232204   | 7.52E-04 | 1.87E-03 |
| NEP           | 26       | E*10*6,V*14*0                | 2          | V                   | 0.647753 | 1.911241    | 7.52E-04 | 1.87E-03 |
| NEP           | 37       | R*14*0,S*10*6                | 2          | S                   | -0.64775 | 0.5232204   | 7.52E-04 | 1.87E-03 |
| NEP           | 40       | I*14*0,L*10*6                | 2          | L                   | -0.64775 | 0.5232204   | 7.52E-04 | 1.87E-03 |
| NEP           | 48       | A*10*6,S*14*0                | 2          | S                   | 0.647753 | 1.911241    | 7.52E-04 | 1.87E-03 |
| NEP           | 63       | A*14*0,G*10*6                | 2          | G                   | -0.64775 | 0.5232204   | 7.52E-04 | 1.87E-03 |
| NEP           | 64       | K*10*6,T*14*0                | 2          | T                   | 0.647753 | 1.911241    | 7.52E-04 | 1.87E-03 |
| NEP           | 68       | E*14*0,Q*10*6                | 2          | Q                   | -0.64775 | 0.5232204   | 7.52E-04 | 1.87E-03 |
| NEP           | 81       | A*14*0,E*10*6                | 2          | E                   | -0.64775 | 0.5232204   | 7.52E-04 | 1.87E-03 |



|     |     |                    |   |   |          |           |          |          |
|-----|-----|--------------------|---|---|----------|-----------|----------|----------|
| NEP | 83  | C*14*0,V*10*6      | 2 | V | -0.64775 | 0.5232204 | 7.52E-04 | 1.87E-03 |
| NEP | 85  | H*10*6,N*14*0      | 2 | N | 0.647753 | 1.911241  | 7.52E-04 | 1.87E-03 |
| NEP | 86  | I*14*0,R*10*6      | 2 | R | -0.64775 | 0.5232204 | 7.52E-04 | 1.87E-03 |
| NEP | 88  | K*10*6,T*14*0      | 2 | T | 0.647753 | 1.911241  | 7.52E-04 | 1.87E-03 |
| NEP | 100 | L*14*0,M*10*6      | 2 | M | -0.64775 | 0.5232204 | 7.52E-04 | 1.87E-03 |
| NEP | 111 | Q*10*6,S*14*0      | 2 | S | 0.647753 | 1.911241  | 7.52E-04 | 1.87E-03 |
| NS1 | 21  | L*14*0,R*10*6      | 2 | R | -0.64775 | 0.5232204 | 7.52E-04 | 1.87E-03 |
| NS1 | 22  | F*10*6,L*14*0      | 2 | L | 0.647753 | 1.911241  | 7.52E-04 | 1.87E-03 |
| NS1 | 23  | A*10*6,S*14*0      | 2 | S | 0.647753 | 1.911241  | 7.52E-04 | 1.87E-03 |
| NS1 | 24  | D*10*6,M*14*0      | 2 | M | 0.647753 | 1.911241  | 7.52E-04 | 1.87E-03 |
| NS1 | 25  | Q*10*6,R*14*0      | 2 | R | 0.647753 | 1.911241  | 7.52E-04 | 1.87E-03 |
| NS1 | 26  | D*14*0,E*10*6      | 2 | E | -0.64775 | 0.5232204 | 7.52E-04 | 1.87E-03 |
| NS1 | 27  | I*4*0,L*6*6,M*14*0 | 3 | M | 1.024647 | 2.786111  | 1.74E-04 | 1.87E-03 |
| NS1 | 28  | C*14*0,G*10*6      | 2 | G | -0.64775 | 0.5232204 | 7.52E-04 | 1.87E-03 |
| NS1 | 33  | D*14*0,L*10*6      | 2 | L | -0.64775 | 0.5232204 | 7.52E-04 | 1.87E-03 |
| NS1 | 42  | A*14*0,S*10*6      | 2 | S | -0.64775 | 0.5232204 | 7.52E-04 | 1.87E-03 |
| NS1 | 44  | K*14*0,R*10*6      | 2 | R | -0.64775 | 0.5232204 | 7.52E-04 | 1.87E-03 |
| NS1 | 54  | I*10*6,L*14*0      | 2 | L | 0.647753 | 1.911241  | 7.52E-04 | 1.87E-03 |
| NS1 | 55  | E*10*6,R*14*0      | 2 | R | 0.647753 | 1.911241  | 7.52E-04 | 1.87E-03 |
| NS1 | 56  | T*10*6,V*14*0      | 2 | V | 0.647753 | 1.911241  | 7.52E-04 | 1.87E-03 |
| NS1 | 60  | A*10*6,E*14*0      | 2 | E | 0.647753 | 1.911241  | 7.52E-04 | 1.87E-03 |
| NS1 | 63  | K*14*0,Q*10*6      | 2 | Q | -0.64775 | 0.5232204 | 7.52E-04 | 1.87E-03 |
| NS1 | 67  | D*14*0,R*10*6      | 2 | R | -0.64775 | 0.5232204 | 7.52E-04 | 1.87E-03 |
| NS1 | 70  | E*10*6,K*14*0      | 2 | K | 0.647753 | 1.911241  | 7.52E-04 | 1.87E-03 |
| NS1 | 71  | E*10*6,S*14*0      | 2 | S | 0.647753 | 1.911241  | 7.52E-04 | 1.87E-03 |
| NS1 | 73  | S*10*6,T*14*0      | 2 | T | 0.647753 | 1.911241  | 7.52E-04 | 1.87E-03 |
| NS1 | 76  | A*10*6,N*14*0      | 2 | N | 0.647753 | 1.911241  | 7.52E-04 | 1.87E-03 |
| NS1 | 79  | I*14*0,M*10*6      | 2 | M | -0.64775 | 0.5232204 | 7.52E-04 | 1.87E-03 |
| NS1 | 80  | A*14*0,T*10*6      | 2 | T | -0.64775 | 0.5232204 | 7.52E-04 | 1.87E-03 |
| NS1 | 87  | P*14*0,S*10*6      | 2 | S | -0.64775 | 0.5232204 | 7.52E-04 | 1.87E-03 |
| NS1 | 90  | I*14*0,L*10*6      | 2 | L | -0.64775 | 0.5232204 | 7.52E-04 | 1.87E-03 |

|     |     |               |   |   |          |           |          |          |
|-----|-----|---------------|---|---|----------|-----------|----------|----------|
| NS1 | 94  | S*14*0,T*10*6 | 2 | T | -0.64775 | 0.5232204 | 7.52E-04 | 1.87E-03 |
| NS1 | 95  | I*14*0,L*10*6 | 2 | L | -0.64775 | 0.5232204 | 7.52E-04 | 1.87E-03 |
| NS1 | 98  | I*14*0,M*10*6 | 2 | M | -0.64775 | 0.5232204 | 7.52E-04 | 1.87E-03 |
| NS1 | 101 | D*10*6,E*14*0 | 2 | E | 0.647753 | 1.911241  | 7.52E-04 | 1.87E-03 |
| NS1 | 103 | F*10*6,Y*14*0 | 2 | Y | 0.647753 | 1.911241  | 7.52E-04 | 1.87E-03 |
| NS1 | 108 | K*10*6,R*14*0 | 2 | R | 0.647753 | 1.911241  | 7.52E-04 | 1.87E-03 |
| NS1 | 111 | I*14*0,V*10*6 | 2 | V | -0.64775 | 0.5232204 | 7.52E-04 | 1.87E-03 |
| NS1 | 114 | G*14*0,S*10*6 | 2 | S | -0.64775 | 0.5232204 | 7.52E-04 | 1.87E-03 |
| NS1 | 116 | C*10*6,M*14*0 | 2 | M | 0.647753 | 1.911241  | 7.52E-04 | 1.87E-03 |
| NS1 | 117 | I*10*6,V*14*0 | 2 | V | 0.647753 | 1.911241  | 7.52E-04 | 1.87E-03 |
| NS1 | 118 | K*14*0,R*10*6 | 2 | R | -0.64775 | 0.5232204 | 7.52E-04 | 1.87E-03 |
| NS1 | 127 | N*10*6,R*14*0 | 2 | R | 0.647753 | 1.911241  | 7.52E-04 | 1.87E-03 |
| NS1 | 140 | Q*14*0,R*10*6 | 2 | R | -0.64775 | 0.5232204 | 7.52E-04 | 1.87E-03 |
| NS1 | 145 | I*10*6,V*14*0 | 2 | V | 0.647753 | 1.911241  | 7.52E-04 | 1.87E-03 |
| NS1 | 146 | L*10*6,S*14*0 | 2 | S | 0.647753 | 1.911241  | 7.52E-04 | 1.87E-03 |
| NS1 | 152 | D*14*0,E*10*6 | 2 | E | -0.64775 | 0.5232204 | 7.52E-04 | 1.87E-03 |
| NS1 | 153 | D*14*0,E*10*6 | 2 | E | -0.64775 | 0.5232204 | 7.52E-04 | 1.87E-03 |
| NS1 | 158 | A*14*0,G*10*6 | 2 | G | -0.64775 | 0.5232204 | 7.52E-04 | 1.87E-03 |
| NS1 | 163 | I*14*0,L*10*6 | 2 | L | -0.64775 | 0.5232204 | 7.52E-04 | 1.87E-03 |
| NS1 | 166 | L*10*6,M*14*0 | 2 | M | 0.647753 | 1.911241  | 7.52E-04 | 1.87E-03 |
| NS1 | 170 | S*14*0,T*10*6 | 2 | T | -0.64775 | 0.5232204 | 7.52E-04 | 1.87E-03 |
| NS1 | 171 | D*10*6,T*14*0 | 2 | T | 0.647753 | 1.911241  | 7.52E-04 | 1.87E-03 |
| NS1 | 180 | I*14*0,V*10*6 | 2 | V | -0.64775 | 0.5232204 | 7.52E-04 | 1.87E-03 |
| NS1 | 191 | S*14*0,T*10*6 | 2 | T | -0.64775 | 0.5232204 | 7.52E-04 | 1.87E-03 |
| NS1 | 192 | I*14*0,V*10*6 | 2 | V | -0.64775 | 0.5232204 | 7.52E-04 | 1.87E-03 |
| NS1 | 194 | A*14*0,V*10*6 | 2 | V | -0.64775 | 0.5232204 | 7.52E-04 | 1.87E-03 |
| NS1 | 197 | N*14*0,T*10*6 | 2 | T | -0.64775 | 0.5232204 | 7.52E-04 | 1.87E-03 |
| NS1 | 198 | I*14*0,L*10*6 | 2 | L | -0.64775 | 0.5232204 | 7.52E-04 | 1.87E-03 |
| NS1 | 204 | G*14*0,R*10*6 | 2 | R | -0.64775 | 0.5232204 | 7.52E-04 | 1.87E-03 |
| NS1 | 207 | D*14*0,N*10*6 | 2 | N | -0.64775 | 0.5232204 | 7.52E-04 | 1.87E-03 |
| NS1 | 211 | G*14*0,R*10*6 | 2 | R | -0.64775 | 0.5232204 | 7.52E-04 | 1.87E-03 |

|        |     |                     |   |   |          |           |          |          |
|--------|-----|---------------------|---|---|----------|-----------|----------|----------|
| NS1    | 225 | R*14*0,T*10*6       | 2 | T | -0.64775 | 0.5232204 | 7.52E-04 | 1.87E-03 |
| PB1    | 215 | K*7*0,R*17*6        | 2 | R | 0.748074 | 2.112925  | 3.89E-04 | 1.87E-03 |
| PB1-F2 | 75  | H*2*1,L*0*5,R*22*0  | 3 | L | 1.750964 | 5.760152  | 1.68E-03 | 4.14E-03 |
| PA     | 269 | K*10*1,R*14*5       | 2 | R | -0.59046 | 0.5540735 | 2.00E-03 | 4.74E-03 |
| PA     | 348 | I*14*5,L*10*1       | 2 | L | 0.590458 | 1.804815  | 2.00E-03 | 4.74E-03 |
| PA     | 388 | G*10*1,S*14*5       | 2 | S | -0.59046 | 0.5540735 | 2.00E-03 | 4.74E-03 |
| NEP    | 7   | L*0*3,S*10*3,T*14*0 | 3 | T | -1.30616 | 0.2708583 | 2.23E-03 | 4.77E-03 |
| NS1    | 7   | L*0*3,S*10*3,T*14*0 | 3 | T | -1.30616 | 0.2708583 | 2.23E-03 | 4.77E-03 |
| PB1    | 298 | I*0*5,L*24*1        | 2 | L | -1.69903 | 0.1828609 | 2.26E-03 | 4.77E-03 |
| PB1    | 667 | I*24*1,V*0*5        | 2 | V | 1.699029 | 5.468637  | 2.26E-03 | 4.77E-03 |
| PB1-F2 | 15  | H*24*1,R*0*5        | 2 | R | 1.699029 | 5.468637  | 2.26E-03 | 4.77E-03 |
| PB1-F2 | 23  | N*24*1,S*0*5        | 2 | S | 1.699029 | 5.468637  | 2.26E-03 | 4.77E-03 |
| PB1-F2 | 27  | I*0*5,T*24*1        | 2 | T | -1.69903 | 0.1828609 | 2.26E-03 | 4.77E-03 |
| PB1-F2 | 58  | L*16*1,S*0*5,W*8*0  | 3 | S | 1.7196   | 5.582298  | 2.06E-03 | 4.77E-03 |
| PB2    | 67  | I*24*1,V*0*5        | 2 | V | 1.699029 | 5.468637  | 2.26E-03 | 4.77E-03 |
| PB2    | 152 | A*24*1,S*0*5        | 2 | S | 1.699029 | 5.468637  | 2.26E-03 | 4.77E-03 |
| PB2    | 199 | A*24*1,T*0*5        | 2 | T | 1.699029 | 5.468637  | 2.26E-03 | 4.77E-03 |
| PB2    | 508 | Q*0*5,R*24*1        | 2 | R | -1.69903 | 0.1828609 | 2.26E-03 | 4.77E-03 |
| PB2    | 649 | I*1*5,V*23*1        | 2 | V | -1.47445 | 0.2289058 | 2.08E-03 | 4.77E-03 |
| PA     | 545 | I*14*6,V*10*0       | 2 | V | 0.575901 | 1.778733  | 2.49E-03 | 5.17E-03 |

**Note:** The sites 75 in PB1-F2, 7 in NS1 and 7 in NEP have multiple residue variations associated with pathogenicity. These positions were based on the sequences used in this study.

393 **Supplementary Table S3.** Polymorphic sites in the proteome of North American avian H1N1

394 IAVs in association with their pathogenicity in DBA/2J mice by host effect after adjusting for

395 residue effect

| coding region | position | aa distribution in*Ans*Char | Hostcoef | exp.HostCoef. | HostPvalue | HostFDR  |
|---------------|----------|-----------------------------|----------|---------------|------------|----------|
| PB1-F2        | 75       | H*2*1                       | -4.1433  | 0.01587038    | 1.01E-10   | 1.18E-08 |
| NEP           | 70       | S*24*3                      | -1.07086 | 0.3427139     | 2.52E-04   | 7.39E-03 |
| NS1           | 227      | E*24*3                      | -1.07086 | 0.3427139     | 2.52E-04   | 7.39E-03 |
| PA            | 187      | L*24*3                      | -1.07086 | 0.3427139     | 2.52E-04   | 7.39E-03 |
| PB1           | 642      | N*23*1,S*1*5                | -1.69259 | 0.1840418     | 1.24E-03   | 9.50E-03 |
| PB1-F2        | 78       | K*23*1,R*1*5                | -1.69259 | 0.1840418     | 1.24E-03   | 9.50E-03 |
| HA            | 295      | K*10*6                      | -0.79213 | 0.4528804     | 1.25E-03   | 9.50E-03 |
| NP            | 143      | L*22*6                      | -0.83238 | 0.4350107     | 5.19E-04   | 9.50E-03 |
| NP            | 478      | S*22*6                      | -0.83238 | 0.4350107     | 5.19E-04   | 9.50E-03 |
| PB1           | 215      | R*17*6                      | -0.76757 | 0.4641406     | 9.58E-04   | 9.50E-03 |
| PB1           | 298      | L*24*1                      | -1.69822 | 0.1830083     | 1.19E-03   | 9.50E-03 |
| PB1           | 372      | M*22*6                      | -0.83238 | 0.4350107     | 5.19E-04   | 9.50E-03 |
| PB1           | 667      | I*24*1                      | -1.69822 | 0.1830083     | 1.19E-03   | 9.50E-03 |
| PB1-F2        | 15       | H*24*1                      | -1.69822 | 0.1830083     | 1.19E-03   | 9.50E-03 |
| PB1-F2        | 23       | N*24*1                      | -1.69822 | 0.1830083     | 1.19E-03   | 9.50E-03 |
| PB1-F2        | 27       | T*24*1                      | -1.69822 | 0.1830083     | 1.19E-03   | 9.50E-03 |
| PB2           | 67       | I*24*1                      | -1.69822 | 0.1830083     | 1.19E-03   | 9.50E-03 |
| PB2           | 152      | A*24*1                      | -1.69822 | 0.1830083     | 1.19E-03   | 9.50E-03 |
| PB2           | 199      | A*24*1                      | -1.69822 | 0.1830083     | 1.19E-03   | 9.50E-03 |
| PB2           | 508      | R*24*1                      | -1.69822 | 0.1830083     | 1.19E-03   | 9.50E-03 |
| PB1-F2        | 69       | Q*23*1,R*1*5                | -1.6865  | 0.1851662     | 1.30E-03   | 9.57E-03 |
| PB1-F2        | 8        | P*22*1                      | -1.67741 | 0.1868569     | 1.39E-03   | 9.62E-03 |
| HA            | 173      | N*9*6                       | -0.80132 | 0.4487382     | 1.48E-03   | 9.96E-03 |

396 These positions were based on the sequences used in this study.

397 **Supplementary Table S4.** Polymorphic sites in the proteome of North American avian H1N1 IAVs affecting the pathogenicity of  
 398 viruses in DBA/2J mice by host-residue interactions

| <b>coding region</b> | <b>position</b> | <b>aa distribution in *Ans*Char</b>     | <b>residue.host</b>    | <b>AA.HostCoef</b> | <b>exp.AA.HostCoef.</b> | <b>AA.HostPvalue</b> | <b>residueHostFDR</b> |
|----------------------|-----------------|-----------------------------------------|------------------------|--------------------|-------------------------|----------------------|-----------------------|
| PB1-F2               | 46*M            | <b>M</b> *21, <b>T</b> *9               | T:host_Charadriiformes | 3.1599             | 23.5685                 | 7.21E-06             | 2.38E-04              |
| PB1-F2               | 83*F            | <b>F</b> *19, <b>S</b> *11              | S:host_Charadriiformes | 1.9405             | 6.9621                  | 2.93E-05             | 4.84E-04              |
| NEP                  | 89*K            | <b>I</b> *12, <b>K</b> *14, <b>V</b> *4 | V:host_Charadriiformes | -2.5932            | 0.0748                  | 1.23E-04             | 1.35E-03              |
| NS1                  | 206*S           | <b>C</b> *3, <b>R</b> *14, <b>S</b> *13 | S:host_Charadriiformes | 2.4062             | 11.0921                 | 5.08E-04             | 4.19E-03              |
| PB1-F2               | 90*N            | <b>N</b> *17, <b>S</b> *13              | S:host_Charadriiformes | -1.9701            | 0.1394                  | 1.06E-03             | 6.98E-03              |
| PB1                  | 375*S           | <b>N</b> *10, <b>S</b> *20              | S:host_Charadriiformes | 1.8663             | 6.4642                  | 1.84E-03             | 8.66E-03              |
| PB1-F2               | 26*Q            | <b>Q</b> *24, <b>R</b> *6               | R:host_Charadriiformes | 2.2504             | 9.4916                  | 1.70E-03             | 8.66E-03              |
| PA                   | 272*E           | <b>D</b> *14, <b>E</b> *16              | E:host_Charadriiformes | 1.3672             | 3.9242                  | 3.48E-03             | 8.83E-03              |
| PA                   | 323*V           | <b>I</b> *14, <b>V</b> *16              | V:host_Charadriiformes | 1.3672             | 3.9242                  | 3.48E-03             | 8.83E-03              |
| PA                   | 400*Q           | <b>P</b> *12, <b>Q</b> *16, <b>S</b> *2 | Q:host_Charadriiformes | 1.4109             | 4.0995                  | 2.78E-03             | 8.83E-03              |
| PA-X                 | 16*L            | <b>L</b> *17, <b>S</b> *13              | S:host_Charadriiformes | -1.3964            | 0.2475                  | 2.79E-03             | 8.83E-03              |
| PA-X                 | 23*S            | <b>L</b> *14, <b>S</b> *16              | S:host_Charadriiformes | 1.3672             | 3.9242                  | 3.48E-03             | 8.83E-03              |
| PA-X                 | 59*P            | <b>P</b> *16, <b>Q</b> *14              | Q:host_Charadriiformes | -1.3672            | 0.2548                  | 3.48E-03             | 8.83E-03              |
| PA-X                 | 21*A            | <b>A</b> *25, <b>V</b> *5               | V:host_Charadriiformes | 1.7787             | 5.9223                  | 3.83E-03             | 9.02E-03              |

399 These positions were based on the sequences used in this study.

400 **Supplementary Table S5.** Polymorphic residues at HA antigenic sites of avian H1N1 IAVs

401 compared to human and pandemic H1N1 viruses

402

| Year                 | Antigenic sites and residues |     |     |     |     |     |     |     |    |    |
|----------------------|------------------------------|-----|-----|-----|-----|-----|-----|-----|----|----|
|                      | Sa                           |     | Ca  |     | Sb  |     |     |     | Cb |    |
|                      | 173                          | 178 | 154 | 158 | 202 | 203 | 208 | 212 | 89 | 91 |
| 1918pdm              | S                            | L   | S   | A   | G   | T   | L   | A   | T  | S  |
| 1934                 | G                            | L   | S   | K   | S   | K   | I   | E   | P  | R  |
| 1942                 | G                            | L   | S   | K   | I   | K   | L   | E   | S  | R  |
| 1950                 | G                            | L   | S   | K   | I   | E   | L   | E   | S  | K  |
| 1977                 | G                            | L   | S   | K   | I   | E   | I   | E   | S  | K  |
| 1986                 | G                            | L   | S   | R   | I   | G   | I   | E   | S  | K  |
| 1991                 | G                            | V   | S   | K   | I   | G   | I   | E   | S  | E  |
| 1998                 | G                            | L   | S   | K   | I   | G   | I   | E   | S  | E  |
| 2007                 | G                            | L   | S   | E   | I   | G   | L   | E   | S  | E  |
| 2009pdm              | N                            | L   | P   | A   | S   | A   | L   | A   | T  | S  |
| H1N1_Charadriiformes | N                            | I   | P   | V   | T   | S   | L   | I   | T  | N  |
| H1N1_Anseriformes    | T/N                          | L   | S   | A   | T   | S/N | L   | T/A | T  | N  |

403 **Abbreviations:** pdm, pandemic; A, alanine; E, glutamic acid; G, glycine; I, isoleucine; K, lysine;  
 404 L, leucine; N, asparagine; P, proline; R, arginine; S, serine; T, threonine; V, valine

405

406 **Supplementary Table S6.** Distribution of the GSEV PDZ-binding motif among various IAV  
 407 subtypes from different hosts in publicly available NS1 sequences

| <b>Virus subtype</b> | <b>Human</b> | <b>Swine</b> | <b>Avian</b> | <b>Pika<sup>408</sup></b> |
|----------------------|--------------|--------------|--------------|---------------------------|
| H1N1                 | 1            | 16           | 6            |                           |
| H1N2                 |              | 3            |              |                           |
| H1N7                 |              |              | 2            |                           |
| H1N8                 |              |              | 5            |                           |
| H2N1                 |              |              | 1            |                           |
| H3N2                 | 2            | 4            |              |                           |
| H4N8                 |              |              | 4            |                           |
| H5N1 <sup>a</sup>    | 12 (11)      | na           | 54 (45)      | 4 (4)                     |
| H5N2                 |              |              | 4            |                           |
| H6N1                 |              |              | 2            |                           |
| H6N2                 |              |              | 4            |                           |
| H6N8                 |              |              | 1            |                           |
| H6N9                 |              |              | 1            |                           |
| H7N2                 |              |              | 1            |                           |
| H7N6                 |              |              | 5            |                           |
| H9N2                 |              |              | 12           |                           |
| H13N2                |              |              | 1            |                           |
| H13N6                |              |              | 20           |                           |
| H13N8                |              |              | 1            |                           |
| H13N9                |              |              | 6            |                           |
| H16N3                |              |              | 15           |                           |
| H16N9                |              |              | 1            |                           |
| H13                  |              |              | 1            |                           |
| N6                   |              |              | 1            |                           |
| Mixed                |              |              | 5            |                           |
| <b>TOTAL</b>         | <b>15</b>    | <b>23</b>    | <b>153</b>   | <b>4</b>                  |

409 <sup>a</sup>The number of highly pathogenic H5N1 viruses is shown in parentheses.

410 **Supplementary Table S7.** Distribution of the GSEV motif in publicly available NS1 sequences

411 in terms of isolation year, host, region, and subtype

412

| <b>Isolation year</b> | <b>Host</b>    | <b>Region</b> | <b>Virus subtypes (n)<sup>a</sup></b> | <b>Number of strains</b> |
|-----------------------|----------------|---------------|---------------------------------------|--------------------------|
| 1981                  | swine          | Eurasia       | H1N1                                  | 1                        |
| 1982                  | swine          | Eurasia       | H1N1                                  | 1                        |
| 1983                  | swine          | Eurasia       | H1N1                                  | 1                        |
| 1984                  | swine          | Eurasia       | H1N1 (1), H3N2 (2)                    | 3                        |
| 1985                  | swine          | Eurasia       | H1N1 (2), H3N2 (1)                    | 3                        |
| 1989                  | swine          | Eurasia       | H1N1                                  | 1                        |
| 1990                  | avian (Char)   | S. America    | H2N1                                  | 1                        |
| 1992                  | swine          | Eurasia       | H1N1                                  | 1                        |
| 1993                  | swine          | Eurasia       | H3N2                                  | 1                        |
|                       | avian (Galli)  | N. America    | H5N2                                  | 3                        |
| 1995                  | swine          | Eurasia       | H1N1                                  | 3                        |
| 1997                  | avian          | Eurasia       | H6N9                                  | 1                        |
| 1998                  | avian (Galli)  | N. America    | H6N8, H7N2                            | 2                        |
| 1999                  | avian (Char)   | Eurasia       | H16N3                                 | 2                        |
| 2000                  | swine          | Eurasia       | H1N1, H1N2                            | 2                        |
|                       | avian (Galli)  | Eurasia       | H9N2                                  | 4                        |
| 2001                  | swine          | Eurasia       | H1N1, H1N2                            | 2                        |
|                       | human          | N. America    | H1N1                                  | 1                        |
|                       | avian (Galli)  | N. America    | H6N2                                  | 1                        |
|                       | avian          | Eurasia       | H5N1                                  | 2                        |
| 2002                  | avian (Galli)  | Eurasia       | H9N2                                  | 1                        |
| 2003                  | swine          | Eurasia       | H1N1                                  | 1                        |
| 2004                  | swine          | Eurasia       | H1N1                                  | 1                        |
|                       | avian (Galli)  | N. America    | H6N2                                  | 2                        |
| 2005                  | avian (Char)   | Eurasia       | H13                                   | 1                        |
| 2006                  | swine          | Eurasia       | H1N2                                  | 1                        |
|                       | avian          | Eurasia       | H5N1 (1), H9N2 (3)                    | 4                        |
|                       | avian (Char)   | Eurasia       | H4N8 (4), H16N3 (2)                   | 6                        |
|                       | avian (Char)   | N. America    | H16N3(3), H13N9 (2)                   | 5                        |
| 2007                  | pika           | Eurasia       | H5N1                                  | 4                        |
|                       | human          | Eurasia       | H5N1                                  | 8                        |
|                       | avian (Galli)  | Eurasia       | H5N1                                  | 6                        |
|                       | avian          | Eurasia       | H5N1                                  | 31                       |
|                       | avian (Char)   | N. America    | H13N9                                 | 1                        |
|                       | avian (Passer) | Eurasia       | H5N1                                  | 7                        |



|              |                |            |                                                                                              |            |
|--------------|----------------|------------|----------------------------------------------------------------------------------------------|------------|
| 2008         | avian (Falcon) | Eurasia    | H5N1                                                                                         | 1          |
|              | swine          | Eurasia    | H1N1                                                                                         | 1          |
|              | human          | Eurasia    | H5N1                                                                                         | 4          |
|              | avian          | Eurasia    | H5N1                                                                                         | 1          |
|              |                | N. America | H6N1                                                                                         | 1          |
|              | avian (Galli)  | Eurasia    | H5N1                                                                                         | 1          |
|              | avian (Char)   | Eurasia    | H13N8                                                                                        | 1          |
| 2009         |                | N. America | H13N9 (3), H13N2 (1)                                                                         | 4          |
|              | avian (Falcon) | Eurasia    | H5N1                                                                                         | 1          |
|              | avian          | Eurasia    | H5N1                                                                                         | 1          |
|              |                | N. America | H13N6 (2), H16N3(1),<br>mixed (1)                                                            | 4          |
|              |                |            | H13N6 (10), H16N3 (1),<br>H1N1 (6), H1N7 (2),<br>H1N8 (5), H16N9 (1),<br>H6N1 (1), mixed (3) | 29         |
|              | avian (Char)   | N. America |                                                                                              |            |
|              | avian (Galli)  | Eurasia    | H7N6                                                                                         | 5          |
| 2010         | avian (Char)   | Eurasia    | H16N3                                                                                        | 1          |
|              |                | N. America | H16N3(4), H13N6 (2), unk (1)                                                                 | 7          |
| 2011         | avian (Galli)  | Eurasia    | H5N2, H9N2                                                                                   | 2          |
|              | avian (Galli)  | Eurasia    | H6N2, H9N2 (2)                                                                               | 3          |
|              | avian          | Eurasia    | H5N1, H9N2                                                                                   | 2          |
| 2012         | avian (Char)   | N. America | H13N6 (6), H16N3 (1), N6 (1)                                                                 | 8          |
|              | human          | N. America | H3N2                                                                                         | 1          |
| 2013         | avian          | Eurasia    | H5N1                                                                                         | 1          |
|              | human          | N. America | H3N2                                                                                         | 1          |
| <b>TOTAL</b> |                |            |                                                                                              | <b>195</b> |

413 **Abbreviations:** Char, Charadriiformes; Galli, Galliformes; Passer, Passeriformes; Falcon, Falconiformes

414 <sup>a</sup> n indicates the number of viruses from each subtype

415

416

417 **Supplementary References**

- 418 1. Katz, J. M. *et al.* Molecular correlates of influenza A H5N1 virus pathogenesis in mice. *J. Virol.* **74**,  
419 10807-10810 (2000).
- 420 2. Lee, M. S. *et al.* Characterization of an H5N1 avian influenza virus from Taiwan. *Vet. Microbiol.*  
421 **124**, 193-201, doi:10.1016/j.vetmic.2007.04.021 (2007).
- 422 3. Chen, H. *et al.* Polygenic virulence factors involved in pathogenesis of 1997 Hong Kong H5N1  
423 influenza viruses in mice. *Virus Res.* **128**, 159-163, doi:10.1016/j.virusres.2007.04.017 (2007).
- 424 4. Subbarao, E. K., London, W. & Murphy, B. R. A single amino acid in the PB2 gene of influenza A  
425 virus is a determinant of host range. *J. Virol.* **67**, 1761-1764 (1993).
- 426 5. Gao, Y. *et al.* Identification of amino acids in HA and PB2 critical for the transmission of H5N1  
427 avian influenza viruses in a mammalian host. *PLoS Pathog.* **5**, e1000709,  
428 doi:10.1371/journal.ppat.1000709 (2009).
- 429 6. Yamada, S. *et al.* Biological and structural characterization of a host-adapting amino acid in  
430 influenza virus. *PLoS Pathog.* **6**, e1001034, doi:10.1371/journal.ppat.1001034 (2010).
- 431 7. Mehle, A. & Doudna, J. A. Adaptive strategies of the influenza virus polymerase for replication in  
432 humans. *Proc. Natl. Acad. Sci. U. S. A.* **106**, 21312-21316, doi:10.1073/pnas.0911915106 (2009).
- 433 8. Conenello, G. M., Zamarin, D., Perrone, L. A., Tumpey, T. & Palese, P. A single mutation in the  
434 PB1-F2 of H5N1 (HK/97) and 1918 influenza A viruses contributes to increased virulence. *PLoS*  
435 *Pathog.* **3**, 1414-1421, doi:10.1371/journal.ppat.0030141 (2007).
- 436 9. Chen, G. W. *et al.* Genomic signatures of human versus avian influenza A viruses. *Emerg. Infect.*  
437 *Dis.* **12**, 1353-1360, doi:10.3201/eid1209.060276 (2006).
- 438 10. Igarashi, M. *et al.* Predicting the antigenic structure of the pandemic (H1N1) 2009 influenza virus  
439 hemagglutinin. *PLoS One* **5**, e8553, doi:10.1371/journal.pone.0008553 (2010).
- 440 11. Xu, X., Zhu, X., Dwek, R. A., Stevens, J. & Wilson, I. A. Structural characterization of the 1918  
441 influenza virus H1N1 neuraminidase. *J. Virol.* **82**, 10493-10501, doi:10.1128/JVI.00959-08 (2008).
- 442 12. Hale, B. G., Barclay, W. S., Randall, R. E. & Russell, R. J. Structure of an avian influenza A virus  
443 NS1 protein effector domain. *Virology* **378**, 1-5, doi:10.1016/j.virol.2008.05.026 (2008).
- 444 13. Hay, A. J., Wolstenholme, A. J., Skehel, J. J. & Smith, M. H. The molecular basis of the specific  
445 anti-influenza action of amantadine. *EMBO J.* **4**, 3021-3024 (1985).
- 446 14. Tombari, W., Nsiri, J., Larbi, I., Guerin, J. L. & Ghram, A. Genetic evolution of low pathogenicity  
447 H9N2 avian influenza viruses in Tunisia: acquisition of new mutations. *Viol. J.* **8**, 467,  
448 doi:10.1186/1743-422X-8-467 (2011).
- 449 15. Koçer, Z. A., Krauss, S., Stallknecht, D. E., Rehg, J. E. & Webster, R. G. The potential of avian  
450 H1N1 influenza A viruses to replicate and cause disease in mammalian models. *PLoS One* **7**,  
451 e41609, doi:10.1371/journal.pone.0041609 (2012).

452

453

454
